# Supplementary material
Source: PubMed Central journal article supplement (PMC3778097)
Supplement: NIHMS476815-supplement-01.pdf [file NIHMS476815-supplement-01.pdf]

Supplementary Table 1 – Genes tested using the NanoString assay

| Gene    | Accession      | Targeted Region | Target Sequence                                                                                       |
|---------|----------------|-----------------|-------------------------------------------------------------------------------------------------------|
| ADRB1   | NM_000684.1    | 795-895         | TGTGCATCATGGCCTTCGTGTACCTGCGGGTGTCCGCGAGGCCCAGAAGCAGGTGAAGAAGATCGACAGCTGCGAGCGCCGTTTCCTCGGCGGCCAGC    |
| AM2     | NM_004833.1    | 607-707         | ACGTGCTGCACCAAAAGTCTCTCCTCATGTTAAGCCTGAACAGAAACAGATGGTGGCCAGCAGGAATCTATCAGAGAAGGGTTTCAGAAGCGCTGTTT    |
| ANKRD22 | NM_144590.2    | 57-157          | ACTGGCAGAGCAAATATGACTCAGAAACCCGGCTCCTCAGGGTTGTAACATTAGATGATACAGGCTTGGGTCGTTACACATGACACCAGTGCCTTTGTTTC |
| ANXA1   | NM_000700.1    | 515-615         | GAAATCAGAGACATTAACAGGGTCTACAGAGAGGAAGTGAAGAGAGATCTGGCCAAAGACATAACCTCAGACACATCTGGAGATTTTCGGAACGCTTTGC  |
| POBEC3A | NM_145699.3    | 31-131          | CAGCAGCTTCCAGGTTGCTCTGATGATATATTAAGGCTCCTGAATCCTAAGAGAATGTTGGTGAAGATCTTAACACCACGCTTGAGCAAGTCGCAAGAG   |
| ARNTL   | NM_001178.4    | 140-240         | GCCACGGTGGTCTGGCTAGAGTGTATACGTTTGGACCCAAGCTTAACCTTTTCCAATGTGGAATCCTGGGCCTTCATTGGTTCCGATGTCATAGGAATCT  |
| ATF3    | NM_001674.2    | 705-805         | TTTGATATACATGCTCAACCTTCATCGGCCACGTGTATTGTCCGGGCTCAGAATGGGAGGACTCCAGAAGATGAGAGAAACCTCTTTATCCAACAGATA   |
| ATP10A  | NM_024490.3    | 5095-5195       | AAAAATTCACAGTTGAGTGCATCCCAGCATTCTGTTCCGGGCAGGCATTTTCAGGAAGACCGCCTTGTAGGTATTACATCCCTGGTGTGCTATTTTGCCTG |
| BATF2   | NM_138456.3    | 2004-2104       | GGAGAGAAACCTGGCTCTTACCCAGGTTTACACACATGTAATGAAACACTATGTTAGTATCTAACACACTCCTGGATACAGAACACAAGTCTTGGC      |
| BZLF1   | NM_003666.2    | 1100-1200       | AGCAGGGTAATGGCAGATGAGTTAACCAACTCAAGAGCAGCTTTACAGCGTCAAACCGTGATGCACCGGGCTATACAAGATCTCCTAAGTGAACGGG     |
| 12orf69 | NM_001013698.2 | 565-665         | GTTGCTGTTCTTGGCCTTGGCATAGATATGATTGTCCGTGCCATCCTGGGAGCAGTGGAAAAACACAGCTTCAAGCAGCCATCAAAGTTATGAGAAGC    |
| 5orf56  | NM_001013717.1 | 451-551         | TGAACAAAACCAGCCCTGCTCTCATGCAGCTTATAATCAAGTAGAGAGACAGACATAAATGATTAATAGATGCTCCTGTAATGGCGGTTGTGAGGTG     |
| ARD16   | NM_033292.2    | 575-675         | ACAGGCATGACAATGCTGCTACAAAATCTGGGGTACAGCGTAGATGTGAAAAAATCTCACTGCTTCGGACATGACTACAGAGCTGGAGGCATTTGCAC    |
| CL2     | NM_002982.3    | 0-100           | GAGGAACCGAGAGGCTGAGACTAACCCAGAAACATCCAATTCTCAAAGTGAAGCTCGCACTCTCGCCTCCAGCATGAAAGTCTCTGCCGCCCTTCTGTGC  |
| CL8     | NM_005623.2    | 689-789         | AAGGAGAGATGGGTCAGGGATTCCATGAAGCATCTGGACCAAATATTTCAAATCTGAAGCCATGAGCCTTCATACATGGACTGAGAGTCAGAGCTTGAA   |
| D274    | NM_014143.2    | 684-784         | TAGGAGATTAGATCCTGAGGAAAACCATACAGCTGAATTGGTCATCCCAGAACTACCTCTGGCACATCCTCAAATGAAAGGACTCACTTGGTAATTCTG   |
| D69     | NM_001781.1    | 460-560         | AGGACATGAACTTTCTAAAACGATACGCAGGTAGAGAGGAACACTGGGTTGGACTGAAAAAGGAACCTGGTCACCCATGGAAGTGGTCAAATGGCAAAGA  |
| D80     | NM_005191.3    | 1288-1388       | AAAGATCTGAAGGTCCCACCTCCATTTGCAATTGACCTCTTCTGGGAACTTCTCAGATGGACAAGATTACCCACCTTGGCCTTACGTATCTGCTCTT     |
| FB      | NM_001710.5    | 2029-2129       | TAAGCTGAAATATGGCCAGACTATCAGGCCCATTTGTCTCCCTGCACCGAGGGAAACACTCGAGCTTTGAGGCTTCTCCAACCTCAACTTCCAGCAA     |
| LEC2B   | NM_005127.2    | 980-1080        | AGCTACATTTACCAAATCGTTTGGCATGAGAGGGAGTGAAGGATGTGCCTACCTCAGCGATGATGGTGCAGCAACAGCTAGATGTTACACCGAAAGAAAA  |
| MPK2    | NM_207315.2    | 1570-1670       | GCAGAAAACCTGGAGACCAGGCATCTTAATTTTACTTCAGCCATCGTACCCTCTTCTGACTGATGGACCCGTCATCACAAGGTCCCTCTCATCATGTTCC  |
| CL10    | NM_001565.1    | 40-140          | GCAGAGGAACCTCCAGTCTCAGCACCATGAATCAAACCTGCGATTCTGATTTGCTGCCTTATCTTTCTGACTCTAAGTGGCATTCAAGGAGTACCTCTCTC |
| CL11    | NM_005409.3    | 590-690         | CAGAATCCACTGCCAAAAGGAGTCCAGCAATTAATGGATTTCTAGGAAAAGCTACCTTAAGAAAGGCTGGTTACCATCGGAGTTTACAAAGTGCTTTC    |
| DX58    | NM_014314.3    | 2130-2230       | CTGGCATATTGACTGGACGTGGCAAAACAAATCAGAACACAGGAATGACCCCTCCGCGCACAGAAGTGTATATTGGATGCATTCAAAGCCAGTGGAGATCA |
| DX60    | NM_017631.5    | 660-760         | TTGAGATGCTTATCAAAGAGTGGGGAAGTTTCTTGGAAAGAGAGTTACCCATATTTCTGATAGTTGCAGACGAAGGCCTGAACGATCTACAAACACAG    |
| DX60L   | NM_001012967.1 | 4700-4800       | TCAAAGGTGATCCTTGCCGAACCTCCCGGAGGATTTTAAAGCTGCTTTATATGAGTATAACCTGGCAGTAATGAAGGATTTTGCCTCCTTCTGCTGATTG  |
| NMT3L   | NM_013369.2    | 1050-1150       | AGTCCGGGTGCTGTCCCTTTTGAAGACATCAAGAAAGAGCTGACGAGTTTGGCTTTTTGGAAAGTGGTTCTGACCCGGGACAACCTGAAGCATGTGGTT   |
| F2AK2   | NM_002759.1    | 1760-1860       | TGGAAAGCGAAACAGGAGTAAGGGAACCTTTCGATACATGAGCCAGAACAGATTTCTTCGCAAGACTATGGAAAGGAAGTGGACCTCTACGCTTTGGGG   |
| STI1    | NM_001002264.1 | 610-710         | AGAGAAGCATTTAGAGAGCATCAGCAATACAAAACCGCTGAGTTCTTGGCAAACTGAACACAGAATCGCCAGACAGAAGTGCCTGTCAAAGTGTCTGTTT  |

|    |         |                |           |                                                                                                        |
|----|---------|----------------|-----------|--------------------------------------------------------------------------------------------------------|
| 1  |         |                |           |                                                                                                        |
| 2  |         |                |           |                                                                                                        |
| 3  |         |                |           |                                                                                                        |
| 4  |         |                |           |                                                                                                        |
| 5  | ETV7    | NM_016135.2    | 794-894   | ATTGACGGCAGGATCGCTGACTGCCGCCTGCTGTGGGATTACGTGTATCAGCTGCTCCTTGATACCCGATATGAGCCCTACATCAAGTGGGAAGACAAGG   |
| 6  | FAM122C | NM_001170779.1 | 375-475   | AAGCCTTGAGAACTTATTCCTCGACCCGGACATGGCACAGGAGAAAATGAAACTAGGTTTCAAGTCGCTGCCGAGTTCCTACTACCCGACAGCGCAACATT  |
| 7  | FAM124A | NM_145019.2    | 1050-1150 | ATGGGAACAAGATCCTCCTACAGGCACAAAGGGTGCATAAGAAGTTTCTAAACCTGGCAGAGTACATCATGCCTCCGAGAAGAAACGTCATTCCACTCC    |
| 8  | FAM153A | NM_173663.3    | 1621-1721 | TTTTCAAGATGAGGTTGGAGGCTTCTGTATGTAGAGGGCACTGGCTTGGCCAAATGCCAACAAAACAAACCCTTGAAGACATTTCAGGGCCATGCTCAC    |
| 9  | FAM26F  | NM_001010919.1 | 900-1000  | AGGGCCAGTACTACAGCATGTTGCACAAATATGTCAACAGAAAAGAGAAGACTCACAGTATCAGGTCTACTGAAGGAGATACGGTGATTCTGTTCTTGG    |
| 10 | AR2     | NM_018099.3    | 235-335   | TCTTTCAGGAGCTATAAAAGAAAGGGAGGAATCATGTCCACAATTGCAGCTTTCTATGGCGGCAAGTCCATTCTCATCACGGGGGCCACAGGCTTTCTGG   |
| 11 | BXO6    | NM_018438.5    | 420-520   | TAGGAACCTCCTGCGCAACCCGTGTGCTGAAGAGGATATGTTTGCATGGCAAATTGATTTCAATGGTGGGGACCGCTGGAAGGTGGAGAGCCTCCCTGGA   |
| 12 | CGR1A   | NM_000566.3    | 1545-1645 | CCAGGAGTGGGTAGATTTTCAAGGGAGACAAGAGGGAATAGTATAGACAATAAGGAAGGAAATAGTACTTACAAATGACTCCTAAGGGACTGTGAGACTGAG |
| 13 | CGR1B   | NM_001017986.2 | 980-1080  | ACAACACCAGAACTGTGTGTCTCATGGTATATAACTCTTAAAGCAAATAAATGAACTGACTTCAACTGGGATACATTTGGAAATGTGGTCATCAAAGATG   |
| 14 | MD3     | NM_174938.4    | 1580-1680 | ACGATGAGATTGACATGCTCTTTGACTGTCCTTCTAGGCTTGAGTTGGAAAGAGAAGACACAGATTCATTTGAGGATCTGGAAGCAGATGAAAACGCCTT   |
| 15 | OT4     | NM_002033.2    | 1345-1445 | GGGGCAGCCGGTGGCCGAAATTGGGCTCCTGCACACAGTGGCCCGCTACAAGTTCTACTGGCTTTCGAGAACTCGCAGCACCTGGATTATACACCGAG     |
| 16 | BP1     | NM_002053.1    | 2110-2210 | CCAGATGACCAGCAGTAGACAAATGGATACTGAGCAGAGTCTTAGGTAAGTCTTGGGAAATATTTGGGCATTGGTCTGGCCAAGTCTACAATGTCCCA     |
| 17 | BP4     | NM_052941.4    | 5150-5250 | TTCTACAAGATATGCCATGGGCCTTTTACAGGGGACACAGGCTTCTTAAACAACCCGGCTTCTCACCTATGTCTTTATTTACAAAGCTGTGCTCC        |
| 18 | BP5     | NM_052942.3    | 1955-2055 | ATTACAGACTGACCAGGCTCTCACAGAGACGGAAAAAAGAAGAAAGAGGCACAAGTGAAGCAGAAGCTGAAAAGGCTGAAGCGCAAAGGTTGGCGGCG     |
| 19 | LS      | NM_014905.3    | 3730-3830 | TCTATGAGCACACTCTGCTGCTTCTAACTTTACATGCCTGATGGCACCTTACTCCAGCAGCTCCAGGTGCTTTTCACTTCCAGTCTAAGCCAG          |
| 20 | MPR     | NM_006877.3    | 325-425   | CCATGTTTACAGCAATTCATAAGCATTACTCCCTGGATGACTGGAAGCTCTTGGCCAAATCACCCAGAATGCCTGCAGAATGTAGCCGTGAGTTCAGG     |
| 21 | OLGA6L4 | NM_033238.2    | 5295-5395 | CGTGTCAACTAATGGGAGCTTACTGGGTTAGAAGTCAGGACACTGAGTTTCAATCCTCACTTAGTAGTCTGTGGCCCTCTTTGGCACATTAACCTCCCTC   |
| 22 | EATR7B1 | XM_001721240.3 | 2560-2660 | TCATGAAGAGTGTGTGCAGGTTACCAAGGCCATCAACAACATCAAGGACCTGGAGGACTTTCATTTGCCAGAAAGACGACTCTTACCAGCATTATAGT     |
| 23 | ERC5    | NM_016323.2    | 935-1035  | TGGGCTGCTGTTTACTTTCCGGTGTGGAAAACATGGGCAACTTGGTCATAATTCACACAGAATGAGCTAAGACCCTGTTTGGTGGCTGAGCTTGTGGG     |
| 24 | ERC6    | NM_001165136.1 | 2075-2175 | TCCATCACCCAGATTTATACTTAGAGTCAGACGAAGTCGCCTGGTTAAAGATGCTCTGCGTCAATTAAGTCAAGCTGAAGCTACTGACTTCTGCAAAGTA   |
| 25 | PSE     | NM_006665.3    | 1625-1725 | GGTCTAACTCTAAAGATGGTGGATGATCAAACCTTGCCACCTTAAATGGAAAAACCTCTCCGGCCAGGAAGTTCCTGGGCTTGCCAGCTTTTCTCATATA   |
| 26 | SH2D    | NM_032855.2    | 1960-2060 | GTGTCAGCACCAGGATTTGAAGCCAGGTGAATCCGAGCCCTTTCCCATATCATCTGTTTGTCTGTGTCTAAAAGCACACTGCAAGCCGGGCTCAGTG      |
| 27 | DO1     | NM_002164.3    | 50-150    | CTATTATAAGATGCTCTGAAAACCTTTCAGACACTGAGGGGACCAGAGGAGCAGACTACAAGAATGGCACACGCTATGGAAAACCTCCTGGACAATCAGT   |
| 28 | I16     | NM_005531.1    | 2255-2355 | ACGACTGAACACAATCAACTGTGAGGAAGGAGATAAACTGAAACTCACAGCTTTGAATTGGCACCCGAAAAGTGGGAATACCGGGGAGTTGAGATCTGTA   |
| 29 | I44     | NM_006417.4    | 750-850   | TTTCCAAGGGCATGTAACGCATCAGGCTTTGGTGGGCACTAATACAACCTGGGATATCTGAGAAGTATAGGACATACTCTATTAGAGACGGGAAAGATGGC  |
| 30 | I44L    | NM_006820.2    | 940-1040  | ATCTCTGCCATTTATGTTGTGTGACTACTATGGGGCTAGATGGGGCAGAAGGAGCAGGACTGTGCATGGATGACATTTCCACATCTTAAAGGTTGTATG    |
| 31 | I6      | NM_002038.3    | 180-280   | GGGGTGGAGGCAGGTAAGAAAAAGTGTCTCGGAGAGCTCGGACAGCGGCTCCGGGTTCTGGAAGGCCCTGACCTTCATGGCCGTGCGGAGGAGACTCGCAG  |
| 32 | IH1     | NM_022168.2    | 185-285   | GCTTGGGAGAACCCTCTCCCTTCTCTGAGAAAAGAAAGATGTGCAATGGGTATTCCACAGACGAGAATTTCCGCTATCTCATCTCGTGCTTCCAGGGCCAGG |
| 33 | IT1     | NM_001548.3    | 1440-1540 | GAGAAAGGCATTAGATCTGAAAAGCTTGGCCTCCTTGGGTTCTGCTACAAATTGGAAGGAAATATGAATGAAGCCCTGGAGTACTATGAGCGGGCCCTG    |
| 34 | IT2     | NM_001547.4    | 1995-2095 | TGCATCCCATAGAGGTTAGTCTGCATAGCCAGTAATGTGCTAAGTTCATCCAAAAGCTGGCGGACCAAAGTCTAAATAGGGCTCAGTATCCCCATCGC     |
| 35 | IT3     | NM_001549.4    | 170-270   | GAAGAACAATCAGCCTGGTACCAGCTTTTTCGGAACAGCAGAGACACAGAGGGCAGTCATGAGTGAGGTACCAAGAATTCCCTGGAGAAAATCCTTCC     |
| 36 | IT5     | NM_012420.2    | 775-875   | TCACAGTGTATCGGCTGGATGATTCTGATAGAGAAGGGTCTGTAAAGAGCTTTTCTCTGGGCTTTGAGAAAAGGCTGTTACCCTGAACCCAGATAACAG    |
| 37 | ITM1    | NM_003641.3    | 482-582   | CCTGTTACTGGTATTCGGCTCTGTGACAGTCTACCATATTATGTTACAGATAATACAGGAAAAACGGGGTACTAGTAGCCGCCATAGCCTGCAACCTT     |
| 38 |         |                |           |                                                                                                        |
| 39 |         |                |           |                                                                                                        |
| 40 |         |                |           |                                                                                                        |
| 41 |         |                |           |                                                                                                        |
| 42 |         |                |           |                                                                                                        |
| 43 |         |                |           |                                                                                                        |
| 44 |         |                |           |                                                                                                        |
| 45 |         |                |           |                                                                                                        |
| 46 |         |                |           |                                                                                                        |
| 47 |         |                |           |                                                                                                        |
| 48 |         |                |           |                                                                                                        |
| 49 |         |                |           |                                                                                                        |

|    |                    |                |           |                                                                                                          |
|----|--------------------|----------------|-----------|----------------------------------------------------------------------------------------------------------|
| 1  |                    |                |           |                                                                                                          |
| 2  |                    |                |           |                                                                                                          |
| 3  |                    |                |           |                                                                                                          |
| 4  |                    |                |           |                                                                                                          |
| 5  | FITM2              | NM_006435.2    | 4-104     | AAACTGTTGAGAAAACGGAACACTACTGGGGAAAGGGAGGGGCTCACTGAGAACCATCCCGGTAACCCGATCACCGCTGGTCACCATGAACCACATTGTGCAA  |
| 6  | FITM3              | NM_021034.2    | 40-140    | AGGGAGGGCTCACTGAGAACCATCCCAGTAACCCGACCGCCGCTGGTCTTCGCTGGACACCATGAATCACACTGTCCAAACCTTCTTCTCCTGTCAAAC      |
| 7  | FNA4 <sup>1</sup>  | NM_021068.2    | 725-825   | ATAACCACCACGAGTTGAATCAAAATTTTCAAATGTTTTCAGCAGTGTGAAGAAGCTTGGTGTATACCTGTGCAGGCACTAGTCCTTTACAGATGACAAT     |
| 8  | FNA6 <sup>2</sup>  | NM_021002.1    | 46-146    | GCAAGTCAAGCTGCTCTCTGGACTGTGATCTGCCTCAGACCCACAGCCTGGGTACAGGAGGACCATGATGCTCCTGGCACAAATGAGGAGAATCTCTCT      |
| 9  | FNB1               | NM_002176.2    | 610-710   | ACAGACTTACAGTTACCTCCGAACTGAAGATCTCCTAGCCTGTGCCTCTGGGACTGGACAATTGCTTCAAGCATTCTTCAACCAGCAGATGCTGTTTA       |
| 10 | FNG                | NM_000619.2    | 970-1070  | ATACTATCCAGTTACTGCCGGTTTGA AAAATATGCCTGCAATCTGAGCCAGTGCTTTAATGGCATGTCAGACAGA AACTTGAATGTGTCAGGTGACCCTGAT |
| 11 | 15RA               | NM_002189.2    | 505-605   | ACAACAGCAGCTATTGCCGGGCTCCCAGCTGATGCCTTCAA AATCACCTTCCACAGGAACCACAGAGATAAGCAGTCATGAGTCCTCCACGGCACCC       |
| 12 | 28A-B <sup>3</sup> | NM_172139.2    | 104-204   | CAAGGGGCTGCCACATAGCCAGTTCAAGTCCCTGTCTCCACAGGAGCTGCAGGCCTTTAAAGAGGGCCAAAGATGCCTTAGAAGAGTCGCTTCTGTGAA      |
| 13 | 28RA               | NM_173065.1    | 2690-2790 | TCAGTTAACCTACACCCACCTGAATATAGATGAGCGTAGCTGAGTTTTACCCGTAGGACCGAAGTGTGGTGGAGTATCTGAACAACCTTGCTC            |
| 14 | 29                 | NM_172140.1    | 233-333   | AGCTAGCGAGCTTCAAGAAGGCCAGGGACGCCTTGAAGAGTCACTCAAGCTGAAAACTGGAGTTGCAGCTCTCCTGTCTTCCCGGGAATTGGGACCT        |
| 15 | F1                 | NM_002198.1    | 510-610   | CTGTGCGAGTGACCGGATGCTTCCACCTCTACCAAGAACCAGAGAAAAAGAAAGTCAAGTCCAGCCGAGATGCTAAGAGCAAGGCCAAGAGGAA           |
| 16 | F2                 | NM_002199.2    | 1375-1475 | CAGTACCTGGAGCTTCTTTAACTCAGGACTCCAGCCATTGGTAGACGTGTGTTCTAGAGCCTGCTGGATCTCCAGGGCTACTCAAGTTCAA              |
| 17 | RF7                | NM_001572.3    | 1763-1863 | CGCAGCGTGAGGGTGTGCTTCCCTGGATAGCAGCAGCCTCAGCCTCTGCCTGTCCAGCGCCAACAGCCTCTATGACGACATCGAGTGCTTCTTATGGA       |
| 18 | RF9                | NM_006084.4    | 385-485   | GCACTCAACAAGAGTTCTGAATTTAAGGAGGTTCTGAGAGGGGCCGCATGGATGTTGCTGAGCCCTACAAGGTGTATCAGTTGCTGCCACCAGGAATCG      |
| 19 | G15                | NM_005101.3    | 305-405   | CCCGGCAGCACGGTCTGCTGGTGGTGGACAAATGCGACGAACCTCTGAGCATCCTGGTGAAGAAATAACAAGGGCCGCAGCAGCACCTACGAGGTACGGC     |
| 20 | G20                | NM_002201.4    | 358-458   | GAGTGGCCTGGCTCGTTGCAGCCTCGTGAACGTCCACGGTGTGTGCTGTACGACAAAGTTCATCCGGCCTGAGGGAGAGATCACCGATTACAGAACCCGG     |
| 21 | K2                 | NM_004972.2    | 455-555   | CTCCTCCCGCAGCGCAAATGTTCTGAAAAAGACTCTGCATGGGAATGGCCTGCCTTACGATGACAGAAATGGAGGGAACATCCACCTTCTATATATC        |
| 22 | K3                 | NM_000215.2    | 1715-1815 | GTGCTGCTGAAGGTCATGGATGCCAAGCACAAGA AACTGCATGGAGTCAATCCTGGAAGCAGCGAGCTTGATGAGCCAAGTGTCTGACCGGCATCTCGTGC   |
| 23 | N                  | NM_002228.3    | 140-240   | ACACAGCCAGCCAGCCAGGTCGGCAGTATAGTCCGA AACTGCAAATCTTATTTCTTTTACCTTCTCTACTGCCCAGAGCTAGCGCCTGTGGCTCCC        |
| 24 | NB                 | NM_002229.2    | 1155-1255 | GCGCGCCTGGAGGACAAGGTGAAGACGCTCAAGGCCGAGAACGCGGGGCTGTGAGTACCGCCGGCCTCCTCCGGGAGCAGGTGGCCAGCTCAAACAGA       |
| 25 | AMP3               | NM_014398.3    | 1400-1500 | GGTCTCTGCCTTATGGGTATGGGTGTCTATAAAATCCGCCTAAGGTGTCAATCATCTGGATACCAGAGAATCTAATTGTTGCCCGGGGGAATGAAAATA      |
| 26 | PA                 | NM_001127605.1 | 406-506   | GGAAGAACCATTCTGACAAAGGTCCCAAACAGTTGTCTTCTGCAACATGGCTTGTGCTGGCAGATTCTAGTAACTGGGTACAAACCTTGCCAACAGCAG      |
| 27 | COLN2              | NM_153259.2    | 165-265   | GGCGAAATGAGTCGGCCGTGAACGGTGTTCCTGTTCCGAATCCCGAGAGCCCTGGAAAAGTTTTGAAGGAGGAGGCATGGCCCGCAGCCTTATCGTTTT      |
| 28 | KX                 | NM_173576.2    | 545-645   | CCTCGGCTCGCAGATGACGCTAGTGCAGGTGTCAAATTGGTTTGCTAATGCAAGACGTGGCTTAAAGAATACCGTTTCGACAGCCAGATTTAAGCTGGGCT    |
| 29 | LKL                | NM_152649.1    | 2375-2475 | CAACCAACATGGCAGCTAACACATGAATGAGGCCAATCAAGACCAGAAGAACCCTCAAGCAGATCCCAGCCAAATTGCCATTACACAATCAGGAGC         |
| 30 | NDA                | NM_002432.1    | 787-887   | CCAACGGCAGGTGGATGCAAGAAGAAATGTTCCCAAAAACGACCCAGTGACAGTGGTGGTACTGAAAGCAACAGCGCCATTTAAATACGAGTCCCCAGAA     |
| 31 | X1                 | NM_002462.2    | 1485-1585 | GCCTTTAATCAGGACATCACTGCTCTCATGCAAGGAGAGGAAACTGTAGGGGAGGAAGACATTCGGCTGTTTACCAGACTCCGACACGAGTCCACAAAT      |
| 32 | X2                 | NM_002463.1    | 2188-2288 | AATTTACCGGCTCACTCAGGCGCAGACGCACTGTGCAATTTCCAGCAAAGAGATCCACTGAAGGGCGGCATGCCTGTGGTTGTTTTCTGTGCGTA          |
| 33 | YD88               | NM_002468.3    | 2145-2245 | ACGTTTTTCTAGGTACAGCTCCCAGGAACAGCTAGGTGGGAAAGTCCCATCACTGAGGGAGCCTAACCATGTCCCTGAACAAAAATTGGGCACTCATCTA     |
| 34 | YOF                | NM_013451.3    | 5805-5905 | CTGGATGACTACTTGGGTTTCTAGAACTTGACTTGCCTCACACGATCATTCCTGCAAATCACCAGAGAAATGCAGATTGGACATGATTCGGACCTCA        |
| 35 | COA7               | NM_181782.3    | 3075-3175 | TCAGGATCTGGAGGTGTGGGCATTTGATTGAAATTCAGACTGCCTTAAAATATAACATTA AAAAGACTGGGTTTCGATCAGCCCTCTAAAGCTGGCTGGA    |
| 36 | EXN                | NM_144573.3    | 2035-2135 | GAGCTCCATGTTCAAGAAGCCTCTTAAAAACACATCAGTTGTAGACAGTGAGCCAGTCAGATTTACGGTTAAAGTAACAGGAGAACCCAAACCAGAAAT      |
| 37 | MI                 | NM_004688.1    | 770-870   | TTCCTGACACACTGCGTGAAGATCAAATGAGAGACAAACTAGAGCTGAGCTTTTCAAAGTTCCGAAATGGAGGCGGAGAGGTGGACCGCGTGGACTATGA     |
| 38 |                    |                |           |                                                                                                          |
| 39 |                    |                |           |                                                                                                          |
| 40 |                    |                |           |                                                                                                          |
| 41 |                    |                |           |                                                                                                          |
| 42 |                    |                |           |                                                                                                          |
| 43 |                    |                |           |                                                                                                          |
| 44 |                    |                |           |                                                                                                          |
| 45 |                    |                |           |                                                                                                          |
| 46 |                    |                |           |                                                                                                          |
| 47 |                    |                |           |                                                                                                          |
| 48 |                    |                |           |                                                                                                          |
| 49 |                    |                |           |                                                                                                          |

|    |         |                |           |                                                                                                       |
|----|---------|----------------|-----------|-------------------------------------------------------------------------------------------------------|
| 1  |         |                |           |                                                                                                       |
| 2  |         |                |           |                                                                                                       |
| 3  |         |                |           |                                                                                                       |
| 4  |         |                |           |                                                                                                       |
| 5  | PAS2    | NM_002518.3    | 540-640   | CACCCAGCTGATGTTGGAGGCATTAGATGGCTTCATTATCGCAGTGACAACAGACGGCAGCATCATCTATGTCTCTGACAGTATCACGCCTCTCCTTGGG  |
| 6  | T5C3    | NM_016489.11   | 94-194    | ATGCCAGAATTCAGAAAAGTTTCAGTTCGAATCAAGAACCCTACAAGAGTAGAAGAAATTATCTGTGGTCTTATCAAAGGAGGAGCTGCCAAACTTCAGA  |
| 7  | OAS1    | NM_016816.2    | 5-105     | TCTGAGGAAACGAAACCAACAGCAGTCCAAGCTCAGTCAGCAGAAGAGATAAAAGCAAACAGGTCTGGGAGGCAGTTCTGTTGCCACTCTCTCTCTGTGTC |
| 8  | OAS2    | NM_016817.2    | 2115-2215 | AAGCAAAGGAATGGTTATCCTCTCCCTGCTTCAAGGATGGGACTGAAAACCAATACCACCTTGAAAGTGCCGACAATGCAGACACCAGGAAGTTGTGG    |
| 9  | OAS3    | NM_006187.2    | 4980-5080 | GAGTGCCTTAGACAGCCTGACTCTCCACAACCCTGTTAAAACCTTACCTGCTAGGAATGCTAGATTGAATGGGATGGGAAGAGCCTTCCCTCATTATTG   |
| 10 | DF2L    | NM_020729.2    | 460-560   | CCAGTGAAAGTCATCTCAGCTGCCTGAAGCAGGACATTCTAAATGAAAAGACTGAATTGGAAGCAACACTTAAGGAAGCGGAGTTGGTAACTCATTCTGT  |
| 11 | ARP12   | NM_022750.2    | 2810-2910 | CCTTCTATGATAGCTGCGTGAACAGTGTGCCGACCCCTCCATCTTTGTGATCTTTGAGAAACACCAGGTCTACCCAGAGTATGTCATCCAGTACACCAC   |
| 12 | ARP8    | NM_024615.3    | 1215-1315 | CTATGACAGCAATTAATCGCACAAACTTTTGAACCGTCTTGGCCTGCAGCTGTTAAGTCAGAGGAATGCCTAACTCTAAAGTCGCATAGACTATTGAC    |
| 13 | ARP9    | NM_031458.2    | 2696-2796 | TGGTCATGACAGTGTGGTTGACAATGTCTCCAGCCCTGAAACCTTTGTTATTTTTAGTGGCATGCAGGCTATACCTCAGTATTTGTGGACATGCACCCAG  |
| 14 | ER3     | NM_016831.1    | 1075-1175 | GACCTGATTGGAACATCGATCCTAAGCTACCTGCACCCTGAAGATCGTTCTCTGATGGTTGCCATACACCAAAAAGTTTTGAAGTATGCAGGGCATCCTC  |
| 15 | TPNM3   | NM_031220.3    | 6210-6310 | AAAAGCAGACTCCTTTCATGCATTGGGATGAACGGCCCTCTTGTCTGGGTGCTGGGCTACAGCAAACAAATGTGTTTGAATCCCAGTATCCAGAGATTTC  |
| 16 | LEKHA4  | NM_020904.1    | 320-420   | AGTGTAAAAGGAAGAGAGAGAGAGAGACCCTAAGAGACAGGAGACAAAGAGACAAAAGTGTGAGTGAGCAGGTGAGGAGAGAGATTGAGAACTATGA     |
| 17 | PSCR1   | NM_021105.2    | 355-455   | GGAAACAGCGGCAGCCAGAGAACTGTTTTAATCATGGACAAAACAAACTCACAGATGAATGCTTCTCACCCGGAAACAAACTTGCCAGTTGGGTATCCTC  |
| 18 | PNPT1   | NM_033109.3    | 1540-1640 | GGATTACAGGGTTCCAATTCATCTGCTGTTGCAGGGCTAGCAATAGGATTGGTCACCAAAACCGATCCTGAGAAGGGTGAAATAGAAGATTATCGTTTG   |
| 19 | PRIC285 | NM_033405.3    | 7298-7398 | TGCTCCACCCTGGACTGAGTGTTCGGGGCAGCCTGCTCGGCTGTATGTTTCTCGCAGCTCACCCGCTTCAGTGCGGCTCTGTCCCTGCTGCCGCTCC     |
| 20 | GS1     | NM_002922.3    | 675-775   | CAGGCTAATAGCCTAAAGTACTGGTCCCTGGCTGAAGGGAATTAACAGATAGTATCAAGCGCAGAAGGAATGTGCCAGTATGGCTCCCTGGGTGAACAG   |
| 21 | PK2     | NM_003821.5    | 1695-1795 | ATGCCCTTCTGTCCAGGGACTTGATCATGAAAGAGGACTATGAACTTGTTAGTACCAAGCCTACAAGGACCTCAAAGTCAGACAATTACTAGACTACTAC  |
| 22 | NF213   | NM_020954.2    | 2475-2575 | TTGAGCACCTGGGTCGTTTTCTGCTCATATCCTGGACTGTCTTTCAGGGATTTACTACCGGCTTCCGGGACTTGAGCAAGTCTTGAATACGCAGGATGT   |
| 23 | SAD2    | NM_080657.4    | 473-573   | AGGAAGCTGGTATGGAGAAGATCAACTTTTTCAGGTGGAGAGCCATTTCTTCAAGACCGGGGAGAATACCTGGGCAAGTTGGTGAGTTCTGCAAAGTAGA  |
| 24 | AMD9    | NM_017654.2    | 6525-6625 | TGTGGGGGTGGTAAAAGGGAAGTAGAACCAGAAACAAGATTAGTCTGAGTTAACAATGGCTGCAAGCTGGATACATGGAATTCAGCACACTTTTCTCCCT  |
| 25 | AMD9L   | NM_152703.2    | 422-522   | ACACAGCAGAAAGTTGGGTCAATCCGGCTGCTTTTTGAGAAGTCCCTGAAGAGATCAATAACAGCAAGAGGGAACCTGGCAAGGAAGCTATTCTATAA    |
| 26 | ERPINB9 | NM_004155.3    | 950-1050  | GTTGATGCCTTCCAACAGGGCAAGGCTGACTTGTCCGCAATGTCAGCGGAGAGACCTGTGTCTGTCCAAGTTCGTGCACAAGAGTTTTGTGGAGGTGA    |
| 27 | MCHD1   | NM_015295.2    | 4675-4775 | AACCACCTACACCAGCTGTTTCAAATGTTTCGCTCAGTTGCCAGTAGGACCTTGGTCAGAGATCTACATCTTAGTATCACGGATGACTACGACAACCATAC |
| 28 | PACS1   | NM_003745.1    | 1025-1125 | TTAACTGTATCTGGAGCCAGGACCTGAACTCGCACCTCCTACCTTTCATGTTTACATATACCCAGTATCTTTGCACAAACAGGGGTTGGGGGAGGGTC    |
| 29 | P100    | NM_003113.3    | 1085-1185 | TCATCATAACCAGGCATCTGACATAATAGTCATCAGCAGTGAGGACTCTGAAGGATCCACTGACGTTGATGAGCCCTTAGAAGTCTTCATCTCAGCACCG  |
| 30 | P110    | NM_004510.3    | 265-365   | AAGAGGCTCTTTTTCAGCACTTCATGCACCAGAAGCTGGGGATCGCCTATGCCATACACAAGCCATTTCCCTTCTTTGAAGGCCTCCTAGACAACCTCCAT |
| 31 | P140    | NM_001005176.2 | 245-345   | GGTTCTTCAGAGAAAACAAGTGGAGATTGCAAGTGCAATAACAAGGCCATTTCTTTCTTATGGGCCTCCGAGACCGCTCCTTCATCTCCGAGCAGAT     |
| 32 | T3GAL5  | NM_003896.2    | 1155-1255 | CACACATCTGTGCGATGAAGTCAGTTTGGCGGGTTTTGGATATGACCTCAATCAACCCAGAACACCTTTGCACTACTTCGACAGTCAATGCATGGCTGCT  |
| 33 | TAP1    | NM_012108.2    | 660-760   | GAACCCTTCTTTGGGAAATATGATCCTGAGGCCTGGTAGTGACAGTAGAAACTACTCCATCACTATTGCGCAGGAGATAGACATTCCAAGAATCAAGCAC  |
| 34 | TAT1    | NM_007315.2    | 205-305   | TTTGCTGTATGCCATCCTCGAGAGCTGTCTAGGTTAACGTTTCGCACTCTGTGTATATAACCTCGACAGTCTTGGCACCTAACGTGCTGTGCGTAGCTGCT |
| 35 | TAP2    | NM_000544.3    | 4025-4125 | TTCTTGTGCAGATTTGCCTTTCTTTCATCCTGGGGCTGACTTGCAGCTCCACACCCATCCATCTCTCAAATTTACAGAGGGTAAAATAGGCATTTGGAG   |
| 36 | TPEC    | NM_012252.2    | 890-990   | CTTCACTTGGCACGGTTGATTTAGGTGCTCATGTACCAAACAGCAGAGCCATCCTGAGCAGAATTCAGTAGACTATTGCCAACAACTGACTGTGTCTCA   |
| 37 | LR7     | NM_016562.3    | 4120-4220 | TGTGGGCACCACAGGTGGTTGCTGCTTCAGTGCTTCTGCTCTTTTTCTTGGGCTGCTTCTGGGTTCCATAGGGAAACAGTAAGAAAGAAAGACAC       |
| 38 |         |                |           |                                                                                                       |
| 39 |         |                |           |                                                                                                       |
| 40 |         |                |           |                                                                                                       |
| 41 |         |                |           |                                                                                                       |
| 42 |         |                |           |                                                                                                       |
| 43 |         |                |           |                                                                                                       |
| 44 |         |                |           |                                                                                                       |
| 45 |         |                |           |                                                                                                       |
| 46 |         |                |           |                                                                                                       |
| 47 |         |                |           |                                                                                                       |
| 48 |         |                |           |                                                                                                       |
| 49 |         |                |           |                                                                                                       |



1  
2  
3  
4  
5  
6  
7  
8  
9  
10  
11  
12  
13  
14  
15  
16  
17  
18  
19  
20  
21  
22  
23  
24  
25  
26  
27  
28  
29  
30  
31  
32  
33  
34  
35  
36  
37  
38  
39  
40  
41  
42  
43  
44  
45  
46  
47  
48  
49

|                     |                |           |                                                                                                        |
|---------------------|----------------|-----------|--------------------------------------------------------------------------------------------------------|
| MEM132E             | NM_207313.1    | 1505-1605 | TGGAATGCGAGTCTGACAATGAAGACATCATCAAGGTATCCAGCAGCTGTGACTACGTGTTTGTGAGTGGAAAAGAGTCTCGAGGGTCCATGAACGCCAG   |
| MEM171              | NM_173490.6    | 492-592   | CCCCACCGAGCCTTCATCTGTGGAGAGAGCCGCCAGTTTGCCAGTGCCTTATCTTTGGGTTTCTGTTCTTGACAAGCGGCATGCTCATCAGCGTCCTGG    |
| MEM229B             | NM_182526.2    | 1935-2035 | GTTTGGTGGGAAAAGCCAGAGTTCTAGGTCATCTATTCCCTGCCTGGTTTATTTTCAAGCCAAAAGTGCAGCAGTCTAGCTTTCTATGGGATGGAGAAGC   |
| IFRSF10B            | NM_003842.3    | 565-665   | GCATCTCTGCAAATATGGACAGGACTATAGCACTCACTGGAATGACCTCCTTTCTGCTTGCCTGCACCAGGTGTGATTGAGGTGAAGTGGAGCTAAG      |
| IFRSF13B            | NM_006573.3    | 635-735   | CAACTCCAGTCAGAACAGCAGAAAATAAGCGTGCCGTTCCAGGGTCCAGAAGAAACAGTCACTCAAGACTGCTTGCAACTGATTGCAGACAGTGAAACACCA |
| IPX2                | NM_001098798.1 | 784-884   | GAAGCCTGTGTGCGCCTACGCACTCTTCTTCAGAGACACTCAGGCCGCCATCAAGGGTCAGAACCCCAAGTGCCTTTCGGTGACGTGTCCAAAATCGTG    |
| IFIM21              | NM_003141.3    | 1190-1290 | AGAGACTCTGTGCGCAGGAAGGGGCACTTTTGCTTAGTTCCAAGAGTGGCTTCTGGACAATTTGGTTGTGGAACAAACAAAATATGAGGCTGGCACCT     |
| IFIM22              | NM_006074.3    | 1745-1845 | CCATGACTGTGTGCCACCGAGCTCCTGAGTGTCTCATTCTTTACCCACTTCTGCATAGTAGCCCTTGTGCTGAGACTCAGATTCTGCACCTGAGTTC      |
| IFIM56              | NM_030961.1    | 2570-2670 | GTGGAGGCCGAGGACATTTTCTGAAGGGCAGGGGTTGGCAACTTTTCAACATGGAGTGCCAAACTGCTAACCCGTCTTCTAGTGTGTGAGAATAGGGAC    |
| IFIM69              | NM_080745.3    | 5-105     | GCTATGAACCTTAAGATTAGACCACTAACTCGAATCTAAATGAGCTGCCCTTGTCTCTACAAAAGAAAAGTTGGGCAGGTAGGGTATTCTAATGAGGGT    |
| IBE2L6              | NM_004223.3    | 1110-1210 | TGTTTCAAACCCTTGCCATCCTGTTAGATTGCCAGTTCCTGGGACCAGGCCTCAGACTGTGAAGTATATATCCTCCAGCATTGAGTCCAGGGGGAGCC     |
| ISP18               | NM_017414.3    | 1458-1558 | GGAAATGCCCAAAACCTTCAGAGATTGACACGCTGTCAATTTCCATTTCCGTTTCTGGATCTACGGAGTCTTCTAAGAGATTTTGAATGAGGAGAAGCA    |
| IFARS               | NM_173701.1    | 2552-2652 | GCAAAGCCAAATCTCAGGGAAAGTCTTGGTTGATGTATCTGGGTCTCCTCTGGAGCACTCTGCCCTCCTGTCAACCCAGTAGAGTAAATAAACTTCTTGG   |
| IFAF1               | NM_199139.1    | 3405-3505 | GTTTGGCCAAAGGACTACAAATAAACCAACGGGAAAAAAGAAAGGTTCCAGTTTTGTCTGAAAATTCTGATTAAGCCTCTGGGCCCTACAGCCTGGAGAAC  |
| house-keeping Genes |                |           |                                                                                                        |
| IFAPDH              | NM_002046.3    | 35-135    | TCCTCCTGTTTCGACAGTCAGCCGCATCTTCTTTTGCCTGCGCAGCCGAGCCACATCGCTCAGACACCATGGGGAAGGTGAAGGTCGGAGTCAACGGATTT  |
| IFPRT1              | NM_000194.1    | 240-340   | TGTGATGAAGGAGATGGGAGGCCATCACATTGTAGCCCTCTGTGTGCTCAAGGGGGGCTATAAATCTTTGCTGACCTGCTGGATTACATCAAAGCACTG    |
| IFBP1               | NM_001328.2    | 425-525   | GAAGTTCAAAGCCCTCCGCATCATCGTCCGGATTGGCAGTGGTTTTGACAACATCGACATCAAGTCGGCCGGGATTTAGGCATTGCCGTCTGCAACGTG    |
| IFMBS               | NM_000190.3    | 315-415   | CATTGCTATGTCCACCACAGGGGACAAGATTCTTGATACTGCACTCTCTAAGATTGGAGAGAAAAGCCTGTTTACCAAGGAGCTTGAACATGCCCTGGAG   |

<sup>1</sup> Also detects IFNA10, IFNA16, IFNA17 and IFNA21

<sup>2</sup> Also detects IFNA2, IFNA1, IFNA13, IFNA14

<sup>3</sup> Detects both IL28A and IL28B

Supplementary Table 2 – Genes with significantly affected hepatic expression by peginterferon treatment. Results are from 2-way ANOVA on microarray results with treatment group and presence of cirrhosis as factors.

| Probeset ID  | Gene Symbol | Gene Title                                                 | RefSeq Transcript ID                                                  | Fold-Change (IFN vs. None) | p-value (IFN vs. None) |
|--------------|-------------|------------------------------------------------------------|-----------------------------------------------------------------------|----------------------------|------------------------|
| 1555131_a_at | PER3        | period homolog 3 (Drosophila)                              | NM_016831                                                             | -2.58901                   | 1.97E-05               |
| 230076_at    | PITPNM3     | PITPNM family member 3                                     | NM_001165966 ///<br>NM_031220                                         | -2.34598                   | 5.35E-10               |
| 220139_at    | DNMT3L      | DNA (cytosine-5-)-methyltransferase 3-like                 | NM_013369 /// NM_175867                                               | -2.31126                   | 6.06E-05               |
| 229309_at    | ADRB1       | adrenergic, beta-1-, receptor                              | NM_000684                                                             | -2.11897                   | 0.000280762            |
| 228737_at    | TOX2        | TOX high mobility group box family member 2                | NM_001098796 ///<br>NM_001098797 ///<br>NM_001098798 ///<br>NM_032883 | -2.09388                   | 6.31E-06               |
| 237226_at    | ---         | ---                                                        | ---                                                                   | -2.05325                   | 0.000119247            |
| 220307_at    | CD244       | CD244 molecule, natural killer cell receptor 2B4           | NM_001166663 ///<br>NM_001166664 ///<br>NM_016382                     | -1.98763                   | 0.000154448            |
| 237484_at    | C12orf69    | chromosome 12 open reading frame 69                        | NM_001013698                                                          | -1.96939                   | 0.000162124            |
| 220112_at    | ANKRD55     | ankyrin repeat domain 55                                   | NM_001039935 ///<br>NM_024669                                         | -1.95544                   | 4.45E-05               |
| 204482_at    | CLDN5       | claudin 5                                                  | NM_001130861 ///<br>NM_003277                                         | -1.89668                   | 6.93E-06               |
| 221756_at    | PIK3IP1     | phosphoinositide-3-kinase interacting protein 1            | NM_001135911 ///<br>NM_052880                                         | -1.8669                    | 0.000149497            |
| 224042_at    | UPB1        | ureidopropionase, beta                                     | NM_016327                                                             | -1.8472                    | 2.97E-05               |
| 220625_s_at  | ELF5        | E74-like factor 5 (ets domain transcription factor)        | NM_001422 /// NM_198381                                               | -1.82274                   | 0.000139391            |
| 209782_s_at  | DBP         | D site of albumin promoter (albumin D-box) binding protein | NM_001352                                                             | -1.79787                   | 0.00022127             |

|             |              |                                                                                  |                                                   |          |             |
|-------------|--------------|----------------------------------------------------------------------------------|---------------------------------------------------|----------|-------------|
| 220999_s_at | CYFIP2       | cytoplasmic FMR1 interacting protein 2                                           | NM_001037332 ///<br>NM_001037333 ///<br>NM_014376 | -1.78427 | 0.000317255 |
| 243708_at   | TMEM132E     | transmembrane protein 132E                                                       | NM_207313                                         | -1.73746 | 0.000111643 |
| 232270_at   | C9orf3       | Chromosome 9 open reading frame 3                                                | NM_032823                                         | -1.73668 | 0.000181653 |
| 214058_at   | MYCL1        | v-myc myelocytomatosis viral oncogene homolog 1, lung carcinoma derived (avian)  | NM_001033081 ///<br>NM_001033082 ///<br>NM_005376 | -1.69851 | 0.000155322 |
| 219452_at   | DPEP2        | dipeptidase 2                                                                    | NM_022355                                         | -1.69379 | 0.000278204 |
| 1559033_at  | LOC255167    | hypothetical LOC255167                                                           | NR_024423 /// NR_024424                           | -1.69355 | 0.000241934 |
| 223602_at   | USP30        | ubiquitin specific peptidase 30                                                  | NM_032663                                         | -1.67493 | 7.93E-05    |
| 231947_at   | MYCT1        | myc target 1                                                                     | NM_025107                                         | -1.63305 | 7.84E-05    |
| 229754_at   | TMEM44       | transmembrane protein 44                                                         | NM_001011655                                      | -1.63012 | 0.000129103 |
| 225840_at   | TEF          | thyrotrophic embryonic factor                                                    | NM_001145398 ///<br>NM_003216                     | -1.62372 | 0.000106191 |
| 237419_at   | ---          | ---                                                                              | ---                                               | -1.60975 | 4.13E-05    |
| 238628_s_at | TRAPPC2L     | trafficking protein particle complex 2-like                                      | NM_016209                                         | -1.58259 | 0.000280711 |
| 207224_s_at | SIGLEC7      | sialic acid binding Ig-like lectin 7                                             | NM_014385 /// NM_016543                           | -1.57979 | 0.000325177 |
| 1556012_at  | KLHDC7A      | kelch domain containing 7A                                                       | NM_152375                                         | -1.5629  | 0.000316468 |
| 215768_at   | SOX5         | SRY (sex determining region Y)-box 5                                             | NM_152989                                         | -1.53629 | 0.000288759 |
| 227596_at   | LOC100288612 | hypothetical protein LOC100288612                                                | XM_002342040 ///<br>XM_002347514                  | -1.52925 | 0.000105269 |
| 219698_s_at | METTL4       | methyltransferase like 4                                                         | NM_022840                                         | 1.51848  | 0.000260465 |
| 233085_s_at | OBFC2A       | oligonucleotide/oligosaccharide-binding fold containing 2A                       | NM_001031716 ///<br>NR_024415                     | 1.51881  | 8.71E-05    |
| 219062_s_at | ZCCHC2       | zinc finger, CCHC domain containing 2                                            | NM_017742                                         | 1.51941  | 5.57E-06    |
| 1552365_at  | SCIN         | scinderin                                                                        | NM_001112706 ///<br>NM_033128                     | 1.52845  | 4.22E-05    |
| 219994_at   | APBB1IP      | amyloid beta (A4) precursor protein-binding, family B, member 1 interacting prot | NM_019043                                         | 1.5288   | 0.000131892 |

|             |         |                                                                          |                                             |         |             |
|-------------|---------|--------------------------------------------------------------------------|---------------------------------------------|---------|-------------|
| 203567_s_at | TRIM38  | tripartite motif-containing 38                                           | NM_006355                                   | 1.53423 | 0.000162345 |
| 212569_at   | SMCHD1  | structural maintenance of chromosomes flexible hinge domain containing 1 | NM_015295                                   | 1.53472 | 9.45E-07    |
| 200797_s_at | MCL1    | myeloid cell leukemia sequence 1 (BCL2-related)                          | NM_021960 /// NM_182763                     | 1.53799 | 0.00021963  |
| 221816_s_at | PHF11   | PHD finger protein 11                                                    | NM_001040443 /// NM_001040444               | 1.53812 | 4.10E-06    |
| 224701_at   | PARP14  | poly (ADP-ribose) polymerase family, member 14                           | NM_017554                                   | 1.54773 | 1.76E-05    |
| 233072_at   | NTNG2   | netrin G2                                                                | NM_032536                                   | 1.55178 | 0.000124256 |
| 227688_at   | LRCH2   | leucine-rich repeats and calponin homology (CH) domain containing 2      | NM_020871                                   | 1.55676 | 9.05E-06    |
| 217518_at   | MYOF    | myoferlin                                                                | NM_013451 /// NM_133337                     | 1.57131 | 6.66E-07    |
| 221050_s_at | GTPBP2  | GTP binding protein 2                                                    | NM_019096                                   | 1.57687 | 0.000158291 |
| 219716_at   | APOL6   | apolipoprotein L, 6                                                      | NM_030641                                   | 1.5771  | 5.18E-05    |
| 231876_at   | TRIM56  | tripartite motif-containing 56                                           | NM_030961                                   | 1.58135 | 7.60E-05    |
| 218928_s_at | SLC37A1 | solute carrier family 37 (glycerol-3-phosphate transporter), member 1    | NM_018964                                   | 1.59762 | 0.000179542 |
| 216202_s_at | SPTLC2  | serine palmitoyltransferase, long chain base subunit 2                   | NM_004863                                   | 1.61302 | 0.000121372 |
| 205992_s_at | IL15    | interleukin 15                                                           | NM_000585 /// NM_172174                     | 1.63316 | 0.000116026 |
| 224917_at   | MIR21   | microRNA 21                                                              | NR_029493                                   | 1.63991 | 0.000203125 |
| 227877_at   | C5orf39 | chromosome 5 open reading frame 39                                       | NM_001014279                                | 1.6403  | 1.47E-05    |
| 217497_at   | TYMP    | thymidine phosphorylase                                                  | NM_001113755 /// NM_001113756 /// NM_001953 | 1.64178 | 2.31E-05    |
| 1562289_at  | ---     | ---                                                                      | ---                                         | 1.6543  | 2.02E-05    |
| 233220_at   | GRIN3A  | glutamate receptor, ionotropic, N-methyl-D-aspartate 3A                  | NM_133445                                   | 1.65612 | 0.000159116 |
| 207113_s_at | TNF     | tumor necrosis factor                                                    | NM_000594                                   | 1.65705 | 6.99E-05    |

|             |              |                                                           |                                                                       |         |             |
|-------------|--------------|-----------------------------------------------------------|-----------------------------------------------------------------------|---------|-------------|
| 203217_s_at | ST3GAL5      | ST3 beta-galactoside alpha-2,3-sialyltransferase 5        | NM_001042437 ///<br>NM_003896                                         | 1.66133 | 0.00013857  |
| 240770_at   | TMEM171      | transmembrane protein 171                                 | NM_001161342 ///<br>NM_173490                                         | 1.67229 | 0.000258764 |
| 225557_at   | CSRNP1       | cysteine-serine-rich nuclear protein 1                    | NM_033027                                                             | 1.67348 | 0.000208113 |
| 222146_s_at | TCF4         | transcription factor 4                                    | NM_001083962 ///<br>NM_003199                                         | 1.68179 | 0.000229171 |
| 237223_at   | ---          | ---                                                       | ---                                                                   | 1.69817 | 0.000133884 |
| 204211_x_at | EIF2AK2      | eukaryotic translation initiation factor 2-alpha kinase 2 | NM_001135651 ///<br>NM_001135652 ///<br>NM_002759                     | 1.70006 | 1.93E-07    |
| 218805_at   | GIMAP5       | GTPase, IMAP family member 5                              | NM_018384                                                             | 1.70127 | 0.00020245  |
| 1568592_at  | TRIM69       | tripartite motif-containing 69                            | NM_080745 /// NM_182985                                               | 1.707   | 4.69E-05    |
| 231292_at   | EID3         | EP300 interacting inhibitor of differentiation 3          | NM_001008394                                                          | 1.71686 | 7.37E-05    |
| 229109_s_at | BLVRA        | Biliverdin reductase A                                    | NM_000712                                                             | 1.72178 | 0.000288321 |
| 226773_at   | ---          | ---                                                       | ---                                                                   | 1.72678 | 0.000261065 |
| 234987_at   | C20orf118    | chromosome 20 open reading frame 118                      | NM_080628                                                             | 1.73253 | 6.60E-05    |
| 222859_s_at | DAPP1        | dual adaptor of phosphotyrosine and 3-phosphoinositides   | NM_014395                                                             | 1.73254 | 0.000190071 |
| 210705_s_at | TRIM5        | tripartite motif-containing 5                             | NM_033034 /// NM_033092<br>/// NM_033093                              | 1.73459 | 7.07E-05    |
| 228577_x_at | ODF2L        | outer dense fiber of sperm tails 2-like                   | NM_001007022 ///<br>NM_001184765 ///<br>NM_001184766 ///<br>NM_020729 | 1.73702 | 4.52E-05    |
| 209305_s_at | GADD45B      | growth arrest and DNA-damage-inducible, beta              | NM_015675                                                             | 1.73806 | 0.000319618 |
| 1555853_at  | LOC100507463 | hypothetical LOC100507463                                 | NR_037173                                                             | 1.73936 | 1.65E-05    |
| 218543_s_at | PARP12       | poly (ADP-ribose) polymerase family, member 12            | NM_022750                                                             | 1.74678 | 5.70E-06    |
| 210785_s_at | C1orf38      | chromosome 1 open reading frame 38                        | NM_001039477 ///<br>NM_001105556 ///                                  | 1.74932 | 0.000236668 |

|             |                            |                                                                                  |                                                                                  |         |             |
|-------------|----------------------------|----------------------------------------------------------------------------------|----------------------------------------------------------------------------------|---------|-------------|
|             |                            |                                                                                  | NM_004848                                                                        |         |             |
| 213596_at   | CASP4                      | caspase 4, apoptosis-related cysteine peptidase                                  | NM_001225 /// NM_033306                                                          | 1.75085 | 7.33E-05    |
| 219734_at   | SIDT1                      | SID1 transmembrane family, member 1                                              | NM_017699                                                                        | 1.75167 | 0.00013273  |
| 228617_at   | XAF1                       | XIAP associated factor 1                                                         | NM_017523 /// NM_199139                                                          | 1.75313 | 5.45E-05    |
| 218501_at   | ARHGEF3                    | Rho guanine nucleotide exchange factor (GEF) 3                                   | NM_001128615 ///<br>NM_001128616 ///<br>NM_019555                                | 1.76164 | 6.32E-06    |
| 220449_at   | MGC5566                    | hypothetical protein MGC5566                                                     | XM_926767 /// XM_938022                                                          | 1.7695  | 2.08E-05    |
| 212641_at   | HIVEP2                     | human immunodeficiency virus type I enhancer binding protein 2                   | NM_006734                                                                        | 1.78903 | 6.04E-05    |
| 221044_s_at | TRIM34 ///<br>TRIM6-TRIM34 | tripartite motif-containing 34 /// TRIM6-TRIM34 readthrough                      | NM_001003819 ///<br>NM_001003827 ///<br>NM_021616 /// NM_130389<br>/// NM_130390 | 1.78915 | 8.77E-06    |
| 219033_at   | PARP8                      | poly (ADP-ribose) polymerase family, member 8                                    | NM_001178055 ///<br>NM_001178056 ///<br>NM_024615                                | 1.7942  | 0.000143264 |
| 225646_at   | CTSC                       | cathepsin C                                                                      | NM_001114173 ///<br>NM_001814 /// NM_148170                                      | 1.79429 | 8.58E-05    |
| 225447_at   | GPD2                       | glycerol-3-phosphate dehydrogenase 2 (mitochondrial)                             | NM_000408 ///<br>NM_001083112                                                    | 1.797   | 0.000216468 |
| 209716_at   | CSF1                       | colony stimulating factor 1 (macrophage)                                         | NM_000757 /// NM_172210<br>/// NM_172211 ///<br>NM_172212                        | 1.80368 | 7.17E-05    |
| 226497_s_at | FLT1                       | fms-related tyrosine kinase 1 (vascular endothelial growth factor/vascular perme | NM_001159920 ///<br>NM_001160030 ///<br>NM_001160031 ///<br>NM_002019            | 1.82657 | 9.82E-05    |
| 221841_s_at | KLF4                       | Kruppel-like factor 4 (gut)                                                      | NM_004235                                                                        | 1.83109 | 0.000325972 |
| 225710_at   | GNB4                       | guanine nucleotide binding protein (G protein), beta polypeptide 4               | NM_021629                                                                        | 1.84623 | 2.98E-07    |

|             |          |                                                                                  |                                                                                              |         |             |
|-------------|----------|----------------------------------------------------------------------------------|----------------------------------------------------------------------------------------------|---------|-------------|
| 209545_s_at | RIPK2    | receptor-interacting serine-threonine kinase 2                                   | NM_003821                                                                                    | 1.84869 | 1.85E-05    |
| 35254_at    | TRAFD1   | TRAF-type zinc finger domain containing 1                                        | NM_001143906 ///<br>NM_006700                                                                | 1.85817 | 5.12E-05    |
| 227262_at   | HAPLN3   | hyaluronan and proteoglycan link protein 3                                       | NM_178232                                                                                    | 1.85858 | 3.17E-05    |
| 203236_s_at | LGALS9   | lectin, galactoside-binding, soluble, 9                                          | NM_002308 /// NM_009587<br>/// NR_024043                                                     | 1.85999 | 1.87E-05    |
| 227606_s_at | STAMBPL1 | STAM binding protein-like 1                                                      | NM_020799                                                                                    | 1.86576 | 2.48E-05    |
| 202307_s_at | TAP1     | transporter 1, ATP-binding cassette, sub-family B (MDR/TAP)                      | NM_000593                                                                                    | 1.86785 | 5.87E-06    |
| 219011_at   | PLEKHA4  | pleckstrin homology domain containing, family A (phosphoinositide binding specif | NM_001161354 ///<br>NM_020904                                                                | 1.87129 | 0.000114178 |
| 213293_s_at | TRIM22   | tripartite motif-containing 22                                                   | NM_006074                                                                                    | 1.87179 | 1.67E-05    |
| 210561_s_at | WSB1     | WD repeat and SOCS box-containing 1                                              | NM_015626 /// NM_134265                                                                      | 1.88158 | 9.26E-05    |
| 201631_s_at | IER3     | immediate early response 3                                                       | NM_003897                                                                                    | 1.88788 | 0.000247675 |
| 226474_at   | NLRC5    | NLR family, CARD domain containing 5                                             | NM_032206                                                                                    | 1.88875 | 0.000281632 |
| 239108_at   | FAR2     | Fatty acyl CoA reductase 2                                                       | NM_018099                                                                                    | 1.89228 | 5.89E-05    |
| 213982_s_at | RABGAP1L | RAB GTPase activating protein 1-like                                             | NM_001035230 ///<br>NM_014857                                                                | 1.89546 | 1.89E-06    |
| 230480_at   | PIWIL4   | piwi-like 4 (Drosophila)                                                         | NM_152431                                                                                    | 1.91289 | 0.000162972 |
| 227807_at   | PARP9    | poly (ADP-ribose) polymerase family, member 9                                    | NM_001146102 ///<br>NM_001146103 ///<br>NM_001146104 ///<br>NM_001146105 ///<br>NM_001146106 | 1.91913 | 5.69E-05    |
| 235457_at   | MAML2    | mastermind-like 2 (Drosophila)                                                   | NM_032427                                                                                    | 1.92146 | 7.74E-06    |
| 218694_at   | ARMCX1   | armadillo repeat containing, X-linked 1                                          | NM_016608                                                                                    | 1.92246 | 0.000300344 |
| 202531_at   | IRF1     | interferon regulatory factor 1                                                   | NM_002198                                                                                    | 1.92273 | 0.000207967 |



|             |          |                                                                                 |                                                                       |         |             |
|-------------|----------|---------------------------------------------------------------------------------|-----------------------------------------------------------------------|---------|-------------|
| 203964_at   | NMI      | N-myc (and STAT) interactor                                                     | NM_004688                                                             | 1.92464 | 5.84E-05    |
| 225778_at   | RBMS2    | RNA binding motif, single stranded interacting protein 2                        | NM_002898                                                             | 1.92704 | 3.02E-07    |
| 232155_at   | RNF213   | ring finger protein 213                                                         | NM_020914 /// NM_020954<br>/// XM_002343588                           | 1.93287 | 1.28E-05    |
| 208373_s_at | P2RY6    | pyrimidinergic receptor P2Y, G-protein coupled, 6                               | NM_004154 /// NM_176796<br>/// NM_176797 ///<br>NM_176798             | 1.93383 | 3.36E-06    |
| 213069_at   | HEG1     | HEG homolog 1 (zebrafish)                                                       | NM_020733                                                             | 1.94495 | 2.84E-05    |
| 229937_x_at | LILRB1   | Leukocyte immunoglobulin-like receptor, subfamily B (with TM and ITIM domains), | NM_001081637 ///<br>NM_001081638 ///<br>NM_001081639 ///<br>NM_006669 | 1.94644 | 4.71E-05    |
| 242814_at   | SERPINB9 | serpin peptidase inhibitor, clade B (ovalbumin), member 9                       | NM_004155                                                             | 1.94785 | 0.000300053 |
| 220066_at   | NOD2     | nucleotide-binding oligomerization domain containing 2                          | NM_022162                                                             | 1.95003 | 0.000272543 |
| 205841_at   | JAK2     | Janus kinase 2                                                                  | NM_004972                                                             | 1.9576  | 9.58E-07    |
| 213337_s_at | SOCS1    | suppressor of cytokine signaling 1                                              | NM_003745                                                             | 1.96539 | 0.000141556 |
| 227677_at   | JAK3     | Janus kinase 3                                                                  | NM_000215                                                             | 1.97588 | 0.000175399 |
| 203821_at   | HBEGF    | heparin-binding EGF-like growth factor                                          | NM_001945                                                             | 1.9765  | 3.37E-05    |
| 213294_at   | ---      | ---                                                                             | ---                                                                   | 1.98194 | 9.57E-06    |
| 242974_at   | CD47     | CD47 molecule                                                                   | NM_001025079 ///<br>NM_001777 /// NM_198793                           | 2.00366 | 8.08E-05    |
| 205692_s_at | CD38     | CD38 molecule                                                                   | NM_001775                                                             | 2.00546 | 2.65E-05    |
| 205226_at   | PDGFRL   | platelet-derived growth factor receptor-like                                    | NM_006207                                                             | 2.0078  | 9.98E-06    |
| 220302_at   | MAK      | male germ cell-associated kinase                                                | NM_005906                                                             | 2.0306  | 6.75E-05    |
| 229842_at   | ELF3     | E74-like factor 3 (ets domain transcription factor, epithelial-specific )       | NM_001114309 ///<br>NM_004433                                         | 2.03141 | 0.000264383 |

|             |          |                                                                                   |                                                                                           |         |             |
|-------------|----------|-----------------------------------------------------------------------------------|-------------------------------------------------------------------------------------------|---------|-------------|
| 205505_at   | GCNT1    | glucosaminyl (N-acetyl) transferase 1, core 2                                     | NM_001097633 ///<br>NM_001097634 ///<br>NM_001097635 ///<br>NM_001097636 ///<br>NM_001490 | 2.03674 | 2.97E-06    |
| 220358_at   | BATF3    | basic leucine zipper transcription factor, ATF-like 3                             | NM_018664                                                                                 | 2.04382 | 0.000228799 |
| 204205_at   | APOBEC3G | apolipoprotein B mRNA editing enzyme, catalytic polypeptide-like 3G               | NM_021822                                                                                 | 2.04662 | 8.35E-06    |
| 32088_at    | BLZF1    | basic leucine zipper nuclear factor 1                                             | NM_003666                                                                                 | 2.0629  | 0.000131081 |
| 202934_at   | HK2      | hexokinase 2                                                                      | NM_000189                                                                                 | 2.07231 | 5.42E-05    |
| 202430_s_at | PLSCR1   | phospholipid scramblase 1                                                         | NM_021105                                                                                 | 2.07464 | 3.41E-07    |
| 212810_s_at | SLC1A4   | solute carrier family 1 (glutamate/neutral amino acid transporter), member 4      | NM_001135581 ///<br>NM_003038                                                             | 2.08046 | 0.000266998 |
| 209493_at   | PDZD2    | PDZ domain containing 2                                                           | NM_178140                                                                                 | 2.08458 | 2.86E-05    |
| 223374_s_at | B3GALNT1 | beta-1,3-N-acetylgalactosaminyltransferase 1 (globoside blood group)              | NM_001038628 ///<br>NM_003781 /// NM_033167<br>/// NM_033168 ///<br>NM_033169             | 2.08806 | 0.000120044 |
| 212573_at   | ENDOD1   | endonuclease domain containing 1                                                  | NM_015036                                                                                 | 2.08929 | 5.56E-05    |
| 206011_at   | CASP1    | caspase 1, apoptosis-related cysteine peptidase (interleukin 1, beta, convertase) | NM_001223 /// NM_033292<br>/// NM_033293 ///<br>NM_033294 /// NM_033295                   | 2.09196 | 0.000269084 |
| 210985_s_at | SP100    | SP100 nuclear antigen                                                             | NM_001080391 ///<br>NM_003113                                                             | 2.09473 | 1.04E-05    |
| 236796_at   | BACH2    | BTB and CNC homology 1, basic leucine zipper transcription factor 2               | NM_001170794 ///<br>NM_021813                                                             | 2.10739 | 4.94E-05    |
| 204804_at   | TRIM21   | tripartite motif-containing 21                                                    | NM_003141                                                                                 | 2.11044 | 4.90E-05    |
| 211267_at   | HESX1    | HESX homeobox 1                                                                   | NM_003865                                                                                 | 2.11138 | 3.32E-07    |
| 211434_s_at | CCRL2    | chemokine (C-C motif) receptor-like 2                                             | NM_001130910 ///<br>NM_003965                                                             | 2.12387 | 9.12E-05    |
| 218943_s_at | DDX58    | DEAD (Asp-Glu-Ala-Asp) box polypeptide 58                                         | NM_014314                                                                                 | 2.13869 | 1.86E-05    |

|              |                     |                                                                       |                                                                                          |         |             |
|--------------|---------------------|-----------------------------------------------------------------------|------------------------------------------------------------------------------------------|---------|-------------|
| 1570541_s_at | GBP1P1              | guanylate binding protein 1, interferon-inducible pseudogene 1        | NR_003133                                                                                | 2.14315 | 0.000250624 |
| 206026_s_at  | TNFAIP6             | tumor necrosis factor, alpha-induced protein 6                        | NM_007115                                                                                | 2.14606 | 0.000197842 |
| 239582_at    | PML                 | promyelocytic leukemia                                                | NM_002675 /// NM_033238<br>/// NM_033239 ///<br>NM_033240 /// NM_033244<br>/// NM_033246 | 2.15443 | 0.000111514 |
| 204502_at    | SAMHD1              | SAM domain and HD domain 1                                            | NM_015474                                                                                | 2.15639 | 9.47E-06    |
| 209417_s_at  | IFI35               | interferon-induced protein 35                                         | NM_005533                                                                                | 2.1688  | 0.000246251 |
| 213348_at    | CDKN1C              | cyclin-dependent kinase inhibitor 1C (p57, Kip2)                      | NM_000076 ///<br>NM_001122630 ///<br>NM_001122631                                        | 2.18304 | 9.82E-05    |
| 223501_at    | TNFSF13B            | tumor necrosis factor (ligand) superfamily, member 13b                | NM_001145645 ///<br>NM_006573                                                            | 2.19558 | 3.35E-08    |
| 209732_at    | CLEC2B              | C-type lectin domain family 2, member B                               | NM_005127                                                                                | 2.20616 | 3.13E-06    |
| 227544_at    | TMEM229B            | transmembrane protein 229B                                            | NM_182526                                                                                | 2.21676 | 1.37E-05    |
| 207375_s_at  | IL15RA              | interleukin 15 receptor, alpha                                        | NM_002189 /// NM_172200<br>/// NR_033494                                                 | 2.26153 | 3.06E-06    |
| 244796_at    | ---                 | ---                                                                   | ---                                                                                      | 2.26193 | 4.34E-06    |
| 225076_s_at  | ZNFX1               | zinc finger, NFX1-type containing 1                                   | NM_021035                                                                                | 2.2721  | 6.77E-05    |
| 1564276_at   | C5orf56             | chromosome 5 open reading frame 56                                    | NM_001013717                                                                             | 2.27742 | 0.000176475 |
| 235061_at    | PPM1K               | protein phosphatase, Mg <sup>2+</sup> /Mn <sup>2+</sup> dependent, 1K | NM_152542                                                                                | 2.28503 | 1.77E-05    |
| 202207_at    | ARL4C               | ADP-ribosylation factor-like 4C                                       | NM_005737                                                                                | 2.29035 | 4.72E-05    |
| 202869_at    | OAS1                | 2',5'-oligoadenylate synthetase 1, 40/46kDa                           | NM_001032409 ///<br>NM_002534 /// NM_016816                                              | 2.29902 | 9.67E-05    |
| 211012_s_at  | GOLGA6L4 ///<br>PML | golgin A6 family-like 4 /// promyelocytic leukemia                    | NM_002675 /// NM_033238<br>/// NM_033239 ///<br>NM_033240 /// NM_033244<br>/// NM_033246 | 2.29932 | 6.77E-05    |
| 230130_at    | ---                 | ---                                                                   | ---                                                                                      | 2.31309 | 0.000186003 |

|             |          |                                                                         |                                                           |         |             |
|-------------|----------|-------------------------------------------------------------------------|-----------------------------------------------------------|---------|-------------|
| 217967_s_at | FAM129A  | family with sequence similarity 129, member A                           | NM_052966                                                 | 2.32134 | 1.38E-05    |
| 219863_at   | HERC5    | hect domain and RLD 5                                                   | NM_016323                                                 | 2.32937 | 0.000142361 |
| 237538_at   | ---      | ---                                                                     | ---                                                       | 2.33203 | 9.90E-05    |
| 209959_at   | NR4A3    | nuclear receptor subfamily 4, group A, member 3                         | NM_006981 /// NM_173198<br>/// NM_173199 ///<br>NM_173200 | 2.33457 | 3.88E-05    |
| 209892_at   | FUT4     | fucosyltransferase 4 (alpha (1,3) fucosyltransferase, myeloid-specific) | NM_002033                                                 | 2.33596 | 7.50E-06    |
| 36564_at    | RNF19B   | ring finger protein 19B                                                 | NM_001127361 ///<br>NM_153341                             | 2.35944 | 0.000141267 |
| 213361_at   | TDRD7    | tudor domain containing 7                                               | NM_014290                                                 | 2.36564 | 9.35E-05    |
| 203596_s_at | IFIT5    | interferon-induced protein with tetratricopeptide repeats 5             | NM_012420                                                 | 2.3663  | 2.08E-07    |
| 208436_s_at | IRF7     | interferon regulatory factor 7                                          | NM_001572 /// NM_004029<br>/// NM_004031                  | 2.37311 | 5.17E-05    |
| 225344_at   | NCOA7    | nuclear receptor coactivator 7                                          | NM_001122842 ///<br>NM_181782                             | 2.3777  | 1.23E-06    |
| 229548_at   | SUN2     | Sad1 and UNC84 domain containing 2                                      | NM_001199579                                              | 2.38576 | 1.89E-05    |
| 200628_s_at | WARS     | tryptophanyl-tRNA synthetase                                            | NM_004184 /// NM_173701<br>/// NM_213645 ///<br>NM_213646 | 2.38713 | 7.86E-06    |
| 205098_at   | CCR1     | chemokine (C-C motif) receptor 1                                        | NM_001295                                                 | 2.39001 | 6.44E-07    |
| 225973_at   | TAP2     | transporter 2, ATP-binding cassette, sub-family B (MDR/TAP)             | NM_000544 /// NM_018833                                   | 2.41897 | 7.37E-06    |
| 204187_at   | GMPR     | guanosine monophosphate reductase                                       | NM_006877                                                 | 2.42462 | 7.91E-06    |
| 202988_s_at | RGS1     | regulator of G-protein signaling 1                                      | NM_002922                                                 | 2.42585 | 3.86E-07    |
| 221680_s_at | ETV7     | ets variant 7                                                           | NM_016135                                                 | 2.44152 | 0.000149867 |
| 221432_s_at | SLC25A28 | solute carrier family 25, member 28                                     | NM_031212                                                 | 2.44769 | 0.000103283 |
| 202270_at   | GBP1     | guanylate binding protein 1, interferon-inducible, 67kDa                | NM_002053                                                 | 2.44805 | 1.23E-06    |
| 220146_at   | TLR7     | toll-like receptor 7                                                    | NM_016562                                                 | 2.45272 | 1.11E-05    |

|              |         |                                                       |                                                   |         |             |
|--------------|---------|-------------------------------------------------------|---------------------------------------------------|---------|-------------|
| 241457_at    | FBXL7   | F-box and leucine-rich repeat protein 7               | NM_012304                                         | 2.45523 | 0.000179202 |
| 207777_s_at  | SP140   | SP140 nuclear body protein                            | NM_001005176 ///<br>NM_007237                     | 2.46555 | 1.52E-05    |
| 237105_at    | MIR548N | microRNA 548n                                         | NR_031666                                         | 2.49181 | 6.91E-07    |
| 209795_at    | CD69    | CD69 molecule                                         | NM_001781 /// NR_026671<br>/// NR_026672          | 2.50037 | 2.82E-06    |
| 230519_at    | FAM124A | family with sequence similarity 124A                  | NM_145019                                         | 2.53208 | 1.80E-07    |
| 208012_x_at  | SP110   | SP110 nuclear body protein                            | NM_004509 /// NM_004510<br>/// NM_080424          | 2.53349 | 1.84E-08    |
| 1552623_at   | HSH2D   | hematopoietic SH2 domain containing                   | NM_032855                                         | 2.58663 | 8.20E-06    |
| 222881_at    | HPSE    | heparanase                                            | NM_001098540 ///<br>NM_001166498 ///<br>NM_006665 | 2.62662 | 1.85E-07    |
| 242713_at    | ---     | ---                                                   | ---                                               | 2.64367 | 8.98E-06    |
| 228152_s_at  | DDX60L  | DEAD (Asp-Glu-Ala-Asp) box polypeptide 60-like        | NM_001012967                                      | 2.65189 | 2.75E-08    |
| 206715_at    | TFEC    | transcription factor EC                               | NM_001018058 ///<br>NM_012252                     | 2.65745 | 4.40E-08    |
| 1568615_a_at | SRD5A3  | steroid 5 alpha-reductase 3                           | NM_024592                                         | 2.68402 | 7.94E-06    |
| 228439_at    | BATF2   | basic leucine zipper transcription factor, ATF-like 2 | NM_138456                                         | 2.73706 | 1.23E-06    |
| 219209_at    | IFIH1   | interferon induced with helicase C domain 1           | NM_022168                                         | 2.76461 | 4.57E-07    |
| 229893_at    | FRMD3   | FERM domain containing 3                              | NM_174938                                         | 2.78557 | 6.43E-07    |
| 219211_at    | USP18   | ubiquitin specific peptidase 18                       | NM_017414                                         | 2.82724 | 0.000111634 |
| 238025_at    | MLKL    | mixed lineage kinase domain-like                      | NM_001142497 ///<br>NM_152649                     | 2.84196 | 3.41E-07    |
| 235276_at    | EPSTI1  | epithelial stromal interaction 1 (breast)             | NM_001002264 ///<br>NM_033255                     | 2.86108 | 2.40E-05    |
| 230110_at    | MCOLN2  | mucolipin 2                                           | NM_153259                                         | 2.92668 | 7.06E-05    |
| 220059_at    | STAP1   | signal transducing adaptor family member 1            | NM_012108                                         | 2.93794 | 1.54E-05    |

|             |         |                                                                       |                                                                 |         |            |
|-------------|---------|-----------------------------------------------------------------------|-----------------------------------------------------------------|---------|------------|
| 225291_at   | PNPT1   | polyribonucleotide nucleotidyltransferase 1                           | NM_033109                                                       | 2.94729 | 3.23E-07   |
| 219684_at   | RTP4    | receptor (chemosensory) transporter protein 4                         | NM_022147                                                       | 2.95087 | 9.36E-05   |
| 226757_at   | IFIT2   | interferon-induced protein with tetratricopeptide repeats 2           | NM_001547                                                       | 2.9748  | 1.31E-06   |
| 203153_at   | IFIT1   | interferon-induced protein with tetratricopeptide repeats 1           | NM_001548                                                       | 3.00582 | 4.18E-06   |
| 229625_at   | GBP5    | guanylate binding protein 5                                           | NM_001134486 ///<br>NM_052942                                   | 3.00697 | 5.02E-08   |
| 204959_at   | MNDA    | myeloid cell nuclear differentiation antigen                          | NM_002432                                                       | 3.0148  | 2.09E-06   |
| 235175_at   | GBP4    | guanylate binding protein 4                                           | NM_052941                                                       | 3.03041 | 3.77E-07   |
| 204533_at   | CXCL10  | chemokine (C-X-C motif) ligand 10                                     | NM_001565                                                       | 3.07474 | 0.00022319 |
| 216951_at   | FCGR1A  | Fc fragment of IgG, high affinity Ia, receptor (CD64)                 | NM_000566                                                       | 3.11791 | 1.72E-06   |
| 210029_at   | IDO1    | indoleamine 2,3-dioxygenase 1                                         | NM_002164                                                       | 3.12432 | 4.78E-06   |
| 219352_at   | HERC6   | hect domain and RLD 6                                                 | NM_001165136 ///<br>NM_017912                                   | 3.15105 | 6.06E-06   |
| 228230_at   | PRIC285 | peroxisomal proliferator-activated receptor A interacting complex 285 | NM_001037335 ///<br>NM_033405                                   | 3.15732 | 1.05E-05   |
| 202672_s_at | ATF3    | activating transcription factor 3                                     | NM_001030287 ///<br>NM_001040619 ///<br>NM_001674 /// NM_004024 | 3.15851 | 7.98E-07   |
| 240232_at   | TIMMDC1 | translocase of inner mitochondrial membrane domain containing 1       | NM_016589                                                       | 3.16704 | 3.68E-05   |
| 228531_at   | SAMD9   | sterile alpha motif domain containing 9                               | NM_017654                                                       | 3.21209 | 9.24E-09   |
| 201798_s_at | MYOF    | myoferlin                                                             | NM_013451 /// NM_133337                                         | 3.22684 | 1.44E-09   |
| 236156_at   | LIPA    | lipase A, lysosomal acid, cholesterol esterase                        | NM_000235 ///<br>NM_001127605                                   | 3.23218 | 1.21E-06   |
| 226702_at   | CMPK2   | cytidine monophosphate (UMP-CMP) kinase 2, mitochondrial              | NM_207315                                                       | 3.38597 | 1.24E-06   |

|             |          |                                                                                  |                                                                                     |         |          |
|-------------|----------|----------------------------------------------------------------------------------|-------------------------------------------------------------------------------------|---------|----------|
| 208965_s_at | IFI16    | interferon, gamma-inducible protein 16                                           | NM_005531                                                                           | 3.39401 | 3.39E-06 |
| 203157_s_at | GLS      | glutaminase                                                                      | NM_014905                                                                           | 3.42022 | 6.64E-06 |
| 204972_at   | OAS2     | 2'-5'-oligoadenylate synthetase 2, 69/71kDa                                      | NM_001032731 ///<br>NM_002535 /// NM_016817                                         | 3.44657 | 1.82E-05 |
| 228362_s_at | FAM26F   | Family with sequence similarity 26, member F                                     | NM_001010919                                                                        | 3.46023 | 3.40E-08 |
| 33304_at    | ISG20    | interferon stimulated exonuclease gene 20kDa                                     | NM_002201                                                                           | 3.56131 | 1.80E-07 |
| 206513_at   | AIM2     | absent in melanoma 2                                                             | NM_004833                                                                           | 3.56837 | 1.43E-07 |
| 1554519_at  | CD80     | CD80 molecule                                                                    | NM_005191                                                                           | 3.70194 | 5.17E-07 |
| 223298_s_at | NT5C3    | 5'-nucleotidase, cytosolic III                                                   | NM_001002009 ///<br>NM_001002010 ///<br>NM_001166118 ///<br>NM_016489 /// NR_029372 | 3.84017 | 6.98E-07 |
| 232375_at   | STAT1    | signal transducer and activator of transcription 1                               | NM_007315                                                                           | 3.84556 | 2.21E-06 |
| 202086_at   | MX1      | myxovirus (influenza virus) resistance 1, interferon-inducible protein p78 (mous | NM_001144925 ///<br>NM_001178046 ///<br>NM_002462                                   | 3.91435 | 1.51E-06 |
| 210873_x_at | APOBEC3A | apolipoprotein B mRNA editing enzyme, catalytic polypeptide-like 3A              | NM_145699                                                                           | 4.00738 | 2.50E-10 |
| 227458_at   | CD274    | CD274 molecule                                                                   | NM_014143                                                                           | 4.12901 | 2.55E-06 |
| 210163_at   | CXCL11   | chemokine (C-X-C motif) ligand 11                                                | NM_005409                                                                           | 4.15411 | 5.89E-05 |
| 218400_at   | OAS3     | 2'-5'-oligoadenylate synthetase 3, 100kDa                                        | NM_006187                                                                           | 4.27865 | 1.19E-05 |
| 226603_at   | SAMD9L   | sterile alpha motif domain containing 9-like                                     | NM_152703                                                                           | 4.29144 | 4.32E-12 |
| 214059_at   | IFI44    | Interferon-induced protein 44                                                    | NM_006417                                                                           | 4.32234 | 2.32E-05 |
| 214511_x_at | FCGR1B   | Fc fragment of IgG, high affinity Ib, receptor (CD64)                            | NM_001004340 ///<br>NM_001017986                                                    | 4.45403 | 1.76E-09 |
| 226103_at   | NEXN     | nexilin (F actin binding protein)                                                | NM_001172309 ///<br>NM_144573                                                       | 4.47698 | 1.02E-07 |



|             |         |                                                             |                               |         |          |
|-------------|---------|-------------------------------------------------------------|-------------------------------|---------|----------|
| 216598_s_at | CCL2    | chemokine (C-C motif) ligand 2                              | NM_002982                     | 4.47878 | 5.98E-06 |
| 204747_at   | IFIT3   | interferon-induced protein with tetratricopeptide repeats 3 | NM_001031683 ///<br>NM_001549 | 4.71567 | 1.28E-05 |
| 214255_at   | ATP10A  | ATPase, class V, type 10A                                   | NM_024490                     | 4.73559 | 1.04E-06 |
| 204439_at   | IFI44L  | interferon-induced protein 44-like                          | NM_006820                     | 5.04895 | 3.78E-06 |
| 239196_at   | ANKRD22 | ankyrin repeat domain 22                                    | NM_144590                     | 6.469   | 2.45E-06 |
| 204994_at   | MX2     | myxovirus (influenza virus) resistance 2 (mouse)            | NM_002463                     | 6.79779 | 4.78E-14 |
| 242625_at   | RSAD2   | radical S-adenosyl methionine domain containing 2           | NM_080657                     | 7.09398 | 2.56E-08 |
| 214038_at   | CCL8    | chemokine (C-C motif) ligand 8                              | NM_005623                     | 13.0092 | 1.11E-13 |

Supplementary Table 3 – Genes significantly affected by biochemical response to RBV. Analysis limited to 11 patients from group C (4 biochemical responders and 7 non-responders). Significance set at  $p < 0.0001$

| Probeset ID  | Gene Symbol                                                                                | Gene Title                                                                              | RefSeq Transcript ID                                                                      | Fold-Change (Biochemical responder vs. Non-Responder) | p-value (Responder vs. Non-responder) |
|--------------|--------------------------------------------------------------------------------------------|-----------------------------------------------------------------------------------------|-------------------------------------------------------------------------------------------|-------------------------------------------------------|---------------------------------------|
| 221491_x_at  | HLA-DRB1 /// HLA-DRB3 ///<br>HLA-DRB4 /// HLA-DRB5 ///<br>LOC100133661 ///<br>LOC100294036 | major histocompatibility<br>complex, class II, DR beta 1 ///<br>major histocompatibili  | NM_002124 /// NM_002125<br>/// NM_021983 ///<br>NM_022555 ///<br>XM_001713857 /// XM_0023 | -9.66247                                              | 0.000602055                           |
| 1554890_a_at | TIA1                                                                                       | TIA1 cytotoxic granule-<br>associated RNA binding<br>protein                            | NM_022037 /// NM_022173                                                                   | -2.002                                                | 0.000885062                           |
| 1568720_at   | ZNF506                                                                                     | zinc finger protein 506                                                                 | NM_001099269 ///<br>NM_001145404                                                          | -1.75141                                              | 0.000771341                           |
| 230122_at    | MLLT10                                                                                     | myeloid/lymphoid or mixed-<br>lineage leukemia (trithorax<br>homolog, Drosophila); tran | NM_001009569 ///<br>NM_004641                                                             | -1.664                                                | 0.000758586                           |
| 230132_at    | ---                                                                                        | ---                                                                                     | ---                                                                                       | -1.57853                                              | 0.000147288                           |
| 1559534_at   | ---                                                                                        | ---                                                                                     | ---                                                                                       | -1.56947                                              | 0.000149082                           |
| 233073_at    | ---                                                                                        | ---                                                                                     | ---                                                                                       | -1.4423                                               | 0.000257106                           |
| 1561146_at   | VPS35                                                                                      | vacuolar protein sorting 35<br>homolog ( <i>S. cerevisiae</i> )                         | NM_018206                                                                                 | -1.42419                                              | 0.000247016                           |
| 234151_at    | ---                                                                                        | ---                                                                                     | ---                                                                                       | -1.38873                                              | 0.000446784                           |
| 214234_s_at  | CYP3A5                                                                                     | cytochrome P450, family 3,<br>subfamily A, polypeptide 5                                | NM_000777                                                                                 | -1.33741                                              | 0.000551526                           |
| 1557501_a_at | ---                                                                                        | ---                                                                                     | ---                                                                                       | -1.32185                                              | 0.000620807                           |
| 244707_at    | ---                                                                                        | ---                                                                                     | ---                                                                                       | -1.32052                                              | 0.000132219                           |

|              |           |                                                              |                                             |          |             |
|--------------|-----------|--------------------------------------------------------------|---------------------------------------------|----------|-------------|
| 239703_at    | ---       | ---                                                          | ---                                         | -1.30278 | 0.000529117 |
| 241254_at    | ---       | ---                                                          | ---                                         | -1.2858  | 0.000717329 |
| 220419_s_at  | USP25     | ubiquitin specific peptidase 25                              | NM_013396                                   | -1.28515 | 0.000818128 |
| 1560918_at   | ---       | ---                                                          | ---                                         | -1.27321 | 0.000367402 |
| 224076_s_at  | WHSC1L1   | Wolf-Hirschhorn syndrome candidate 1-like 1                  | NM_017778 /// NM_023034                     | -1.24571 | 2.93E-05    |
| 236652_at    | LOC149703 | hypothetical protein LOC149703                               | ---                                         | -1.22909 | 0.000753747 |
| 224363_at    | ---       | ---                                                          | ---                                         | -1.1935  | 0.000431319 |
| 226261_at    | ZNRF2     | zinc and ring finger 2                                       | NM_147128                                   | -1.18777 | 0.000530898 |
| 1569517_at   | LOC646482 | hypothetical LOC646482                                       | XR_040959 /// XR_040960 /// XR_040961       | -1.17859 | 0.00026739  |
| 229471_s_at  | ---       | ---                                                          | ---                                         | -1.17855 | 0.000423279 |
| 242148_at    | BCL6B     | B-cell CLL/lymphoma 6, member B                              | NM_181844                                   | -1.14357 | 0.000807418 |
| 203475_at    | CYP19A1   | cytochrome P450, family 19, subfamily A, polypeptide 1       | NM_000103 /// NM_031226                     | -1.10382 | 0.000700704 |
| 232519_at    | NSFL1C    | NSFL1 (p97) cofactor (p47)                                   | NM_016143 /// NM_018839 /// NM_182483       | 1.19916  | 0.000477953 |
| 228358_at    | SOX12     | SRY (sex determining region Y)-box 12                        | NM_006943                                   | 1.20088  | 0.000773892 |
| 223842_s_at  | SCARA3    | scavenger receptor class A, member 3                         | NM_016240 /// NM_182826                     | 1.21065  | 0.000600464 |
| 227826_s_at  | ---       | ---                                                          | ---                                         | 1.26475  | 0.000186848 |
| 229134_at    | VANGL1    | vang-like 1 (van gogh, Drosophila)                           | NM_001172411 /// NM_001172412 /// NM_138959 | 1.28068  | 0.000646713 |
| y204729_s_at | STX1A     | syntaxin 1A (brain)                                          | NM_001165903 /// NM_004603                  | 1.32551  | 0.000334617 |
| 211534_x_at  | PTPRN2    | protein tyrosine phosphatase, receptor type, N polypeptide 2 | NM_002847 /// NM_130842 /// NM_130843       | 1.33861  | 0.000760029 |

|             |           |                                                                            |                                                                                           |         |             |
|-------------|-----------|----------------------------------------------------------------------------|-------------------------------------------------------------------------------------------|---------|-------------|
| 204792_s_at | IFT140    | intraflagellar transport 140 homolog (Chlamydomonas)                       | NM_014714                                                                                 | 1.35134 | 0.000983623 |
| 228472_at   | CCDC61    | coiled-coil domain containing 61                                           | NM_001080402                                                                              | 1.36459 | 0.000587411 |
| 218371_s_at | PSPC1     | paraspeckle component 1                                                    | NM_001042414 ///<br>NR_003272                                                             | 1.36978 | 0.000796441 |
| 1556065_at  | LOC284926 | hypothetical protein LOC284926                                             | ---                                                                                       | 1.3858  | 0.000801    |
| 235286_at   | ---       | ---                                                                        | ---                                                                                       | 1.41273 | 0.000882527 |
| 228292_at   | ---       | ---                                                                        | ---                                                                                       | 1.45457 | 0.00036622  |
| 223707_at   | RPL27A    | ribosomal protein L27a                                                     | NM_000990                                                                                 | 1.54586 | 3.08E-05    |
| 219900_s_at | ZNF446    | zinc finger protein 446                                                    | NM_017908                                                                                 | 1.57955 | 0.00018267  |
| 224742_at   | ABHD12    | abhydrolase domain containing 12                                           | NM_001042472 ///<br>NM_015600                                                             | 1.61192 | 0.000578195 |
| 1053_at     | RFC2      | replication factor C (activator 1) 2, 40kDa                                | NM_002914 /// NM_181471                                                                   | 1.64437 | 0.000445032 |
| 200897_s_at | PALLD     | palladin, cytoskeletal associated protein                                  | NM_001166108 ///<br>NM_001166109 ///<br>NM_001166110 ///<br>NM_016081                     | 1.841   | 0.000666866 |
| 219512_at   | DSN1      | DSN1, MIND kinetochore complex component, homolog ( <i>S. cerevisiae</i> ) | NM_001145315 ///<br>NM_001145316 ///<br>NM_001145317 ///<br>NM_001145318 ///<br>NM_024918 | 1.89845 | 0.000220357 |
| 219513_s_at | SH2D3A    | SH2 domain containing 3A                                                   | NM_005490                                                                                 | 1.91176 | 0.00046238  |
| 1557322_at  | ZNF230    | zinc finger protein 230                                                    | NM_006300                                                                                 | 2.08556 | 0.000703733 |
| 244479_at   | ---       | ---                                                                        | ---                                                                                       | 2.16315 | 7.16E-05    |
| 224367_at   | BEX2      | brain expressed X-linked 2                                                 | NM_001168399 ///<br>NM_001168400 ///<br>NM_001168401 ///                                  | 3.58958 | 0.000919075 |

|              |                                                                                            |                                                                                         |                                                                                           |          |             |
|--------------|--------------------------------------------------------------------------------------------|-----------------------------------------------------------------------------------------|-------------------------------------------------------------------------------------------|----------|-------------|
|              |                                                                                            |                                                                                         | NM_032621                                                                                 |          |             |
| 202949_s_at  | FHL2                                                                                       | four and a half LIM domains 2                                                           | NM_001039492 ///<br>NM_001450 /// NM_201555<br>/// NM_201557                              | 4.31229  | 0.000407909 |
| 221491_x_at  | HLA-DRB1 /// HLA-DRB3 ///<br>HLA-DRB4 /// HLA-DRB5 ///<br>LOC100133661 ///<br>LOC100294036 | major histocompatibility<br>complex, class II, DR beta 1 ///<br>major histocompatibili  | NM_002124 /// NM_002125<br>/// NM_021983 ///<br>NM_022555 ///<br>XM_001713857 /// XM_0023 | -9.66247 | 0.000602055 |
| 1554890_a_at | TIA1                                                                                       | TIA1 cytotoxic granule-<br>associated RNA binding<br>protein                            | NM_022037 /// NM_022173                                                                   | -2.002   | 0.000885062 |
| 1568720_at   | ZNF506                                                                                     | zinc finger protein 506                                                                 | NM_001099269 ///<br>NM_001145404                                                          | -1.75141 | 0.000771341 |
| 230122_at    | MLLT10                                                                                     | myeloid/lymphoid or mixed-<br>lineage leukemia (trithorax<br>homolog, Drosophila); tran | NM_001009569 ///<br>NM_004641                                                             | -1.664   | 0.000758586 |
| 230132_at    | ---                                                                                        | ---                                                                                     | ---                                                                                       | -1.57853 | 0.000147288 |
| 1559534_at   | ---                                                                                        | ---                                                                                     | ---                                                                                       | -1.56947 | 0.000149082 |
| 233073_at    | ---                                                                                        | ---                                                                                     | ---                                                                                       | -1.4423  | 0.000257106 |
| 1561146_at   | VPS35                                                                                      | vacuolar protein sorting 35<br>homolog ( <i>S. cerevisiae</i> )                         | NM_018206                                                                                 | -1.42419 | 0.000247016 |
| 234151_at    | ---                                                                                        | ---                                                                                     | ---                                                                                       | -1.38873 | 0.000446784 |
| 214234_s_at  | CYP3A5                                                                                     | cytochrome P450, family 3,<br>subfamily A, polypeptide 5                                | NM_000777                                                                                 | -1.33741 | 0.000551526 |
| 1557501_a_at | ---                                                                                        | ---                                                                                     | ---                                                                                       | -1.32185 | 0.000620807 |
| 244707_at    | ---                                                                                        | ---                                                                                     | ---                                                                                       | -1.32052 | 0.000132219 |
| 239703_at    | ---                                                                                        | ---                                                                                     | ---                                                                                       | -1.30278 | 0.000529117 |
| 241254_at    | ---                                                                                        | ---                                                                                     | ---                                                                                       | -1.2858  | 0.000717329 |
| 220419_s_at  | USP25                                                                                      | ubiquitin specific peptidase 25                                                         | NM_013396                                                                                 | -1.28515 | 0.000818128 |
| 1560918_at   | ---                                                                                        | ---                                                                                     | ---                                                                                       | -1.27321 | 0.000367402 |

|             |           |                                                              |                                             |          |             |
|-------------|-----------|--------------------------------------------------------------|---------------------------------------------|----------|-------------|
| 224076_s_at | WHSC1L1   | Wolf-Hirschhorn syndrome candidate 1-like 1                  | NM_017778 /// NM_023034                     | -1.24571 | 2.93E-05    |
| 236652_at   | LOC149703 | hypothetical protein LOC149703                               | ---                                         | -1.22909 | 0.000753747 |
| 224363_at   | ---       | ---                                                          | ---                                         | -1.1935  | 0.000431319 |
| 226261_at   | ZNRF2     | zinc and ring finger 2                                       | NM_147128                                   | -1.18777 | 0.000530898 |
| 1569517_at  | LOC646482 | hypothetical LOC646482                                       | XR_040959 /// XR_040960 /// XR_040961       | -1.17859 | 0.00026739  |
| 229471_s_at | ---       | ---                                                          | ---                                         | -1.17855 | 0.000423279 |
| 242148_at   | BCL6B     | B-cell CLL/lymphoma 6, member B                              | NM_181844                                   | -1.14357 | 0.000807418 |
| 203475_at   | CYP19A1   | cytochrome P450, family 19, subfamily A, polypeptide 1       | NM_000103 /// NM_031226                     | -1.10382 | 0.000700704 |
| 232519_at   | NSFL1C    | NSFL1 (p97) cofactor (p47)                                   | NM_016143 /// NM_018839 /// NM_182483       | 1.19916  | 0.000477953 |
| 228358_at   | SOX12     | SRY (sex determining region Y)-box 12                        | NM_006943                                   | 1.20088  | 0.000773892 |
| 223842_s_at | SCARA3    | scavenger receptor class A, member 3                         | NM_016240 /// NM_182826                     | 1.21065  | 0.000600464 |
| 227826_s_at | ---       | ---                                                          | ---                                         | 1.26475  | 0.000186848 |
| 229134_at   | VANGL1    | vang-like 1 (van gogh, Drosophila)                           | NM_001172411 /// NM_001172412 /// NM_138959 | 1.28068  | 0.000646713 |
| 204729_s_at | STX1A     | syntaxin 1A (brain)                                          | NM_001165903 /// NM_004603                  | 1.32551  | 0.000334617 |
| 211534_x_at | PTPRN2    | protein tyrosine phosphatase, receptor type, N polypeptide 2 | NM_002847 /// NM_130842 /// NM_130843       | 1.33861  | 0.000760029 |
| 204792_s_at | IFT140    | intraflagellar transport 140 homolog (Chlamydomonas)         | NM_014714                                   | 1.35134  | 0.000983623 |

|             |           |                                                                                  |                                                                                           |         |             |
|-------------|-----------|----------------------------------------------------------------------------------|-------------------------------------------------------------------------------------------|---------|-------------|
| 228472_at   | CCDC61    | coiled-coil domain containing 61                                                 | NM_001080402                                                                              | 1.36459 | 0.000587411 |
| 218371_s_at | PSPC1     | paraspeckle component 1                                                          | NM_001042414 ///<br>NR_003272                                                             | 1.36978 | 0.000796441 |
| 1556065_at  | LOC284926 | hypothetical protein<br>LOC284926                                                | ---                                                                                       | 1.3858  | 0.000801    |
| 235286_at   | ---       | ---                                                                              | ---                                                                                       | 1.41273 | 0.000882527 |
| 228292_at   | ---       | ---                                                                              | ---                                                                                       | 1.45457 | 0.00036622  |
| 223707_at   | RPL27A    | ribosomal protein L27a                                                           | NM_000990                                                                                 | 1.54586 | 3.08E-05    |
| 219900_s_at | ZNF446    | zinc finger protein 446                                                          | NM_017908                                                                                 | 1.57955 | 0.00018267  |
| 224742_at   | ABHD12    | abhydrolase domain<br>containing 12                                              | NM_001042472 ///<br>NM_015600                                                             | 1.61192 | 0.000578195 |
| 1053_at     | RFC2      | replication factor C (activator<br>1) 2, 40kDa                                   | NM_002914 /// NM_181471                                                                   | 1.64437 | 0.000445032 |
| 200897_s_at | PALLD     | palladin, cytoskeletal<br>associated protein                                     | NM_001166108 ///<br>NM_001166109 ///<br>NM_001166110 ///<br>NM_016081                     | 1.841   | 0.000666866 |
| 219512_at   | DSN1      | DSN1, MIND kinetochore<br>complex component, homolog<br>( <i>S. cerevisiae</i> ) | NM_001145315 ///<br>NM_001145316 ///<br>NM_001145317 ///<br>NM_001145318 ///<br>NM_024918 | 1.89845 | 0.000220357 |
| 219513_s_at | SH2D3A    | SH2 domain containing 3A                                                         | NM_005490                                                                                 | 1.91176 | 0.00046238  |
| 1557322_at  | ZNF230    | zinc finger protein 230                                                          | NM_006300                                                                                 | 2.08556 | 0.000703733 |
| 244479_at   | ---       | ---                                                                              | ---                                                                                       | 2.16315 | 7.16E-05    |



1  
2  
3  
4  
5  
6  
7  
8  
9  
10  
11  
12  
13  
14  
15  
16  
17  
18  
19  
20  
21  
22  
23  
24  
25  
26  
27  
28  
29  
30  
31  
32  
33  
34  
35  
36  
37  
38  
39  
40  
41  
42  
43  
44  
45  
46  
47  
48  
49

|             |      |                               |                                                                       |         |             |
|-------------|------|-------------------------------|-----------------------------------------------------------------------|---------|-------------|
| 224367_at   | BEX2 | brain expressed X-linked 2    | NM_001168399 ///<br>NM_001168400 ///<br>NM_001168401 ///<br>NM_032621 | 3.58958 | 0.000919075 |
| 202949_s_at | FHL2 | four and a half LIM domains 2 | NM_001039492 ///<br>NM_001450 /// NM_201555<br>/// NM_201557          | 4.31229 | 0.000407909 |

Confidential: For Review Only

Supplementary Table 4 – Effects of treatment on hepatic expression of ISGs. Results are from 2-way ANOVA on nCounter assay results with treatment group and presence of cirrhosis as factors.

| Gene Symbol   | PEG-IFN (Group B) vs. Controls (Group A) |         | RBV (Group C) vs. Controls (Group A) |         | PEG-IFN+RBV (Group D) vs. Controls (Group A) |         |
|---------------|------------------------------------------|---------|--------------------------------------|---------|----------------------------------------------|---------|
|               | Fold Change                              | p-Value | Fold Change                          | p-Value | Fold Change                                  | p-Value |
| ADRB1         | -1.32                                    | 0.444   | -1.53                                | 0.300   | -1.69                                        | 0.262   |
| AIM2          | 12.09                                    | <0.001  | 2.04                                 | 0.661   | 9.42                                         | 0.002   |
| ANKRD22       | 5.06                                     | 0.003   | -1.53                                | 0.797   | 6.29                                         | <0.001  |
| ANXA1         | 1.19                                     | 0.486   | -1.31                                | 0.416   | 1.04                                         | 0.892   |
| APOBEC3A      | 2.09                                     | 0.715   | 1.85                                 | 0.787   | 12.78                                        | 0.001   |
| ARNTL         | 1.89                                     | 0.004   | 1.07                                 | 0.836   | 2.06                                         | 0.003   |
| ATF3          | 6.77                                     | 0.005   | -1.38                                | 0.895   | 9.45                                         | <0.001  |
| ATP10A        | 5.82                                     | 0.005   | -1.43                                | 0.860   | 4.92                                         | 0.040   |
| BATF2         | 119.11                                   | <0.001  | 3.85                                 | 0.874   | 162.01                                       | <0.001  |
| BLZF1         | 1.97                                     | 0.002   | 1.16                                 | 0.606   | 2.29                                         | <0.001  |
| C12orf69      | -2.56                                    | 0.028   | -4.82                                | 0.007   | -1.86                                        | 0.140   |
| C5orf56       | 2.59                                     | <0.001  | -1.30                                | 0.578   | 2.22                                         | 0.010   |
| CARD16(CASP1) | 2.40                                     | <0.001  | -1.15                                | 0.706   | 2.69                                         | <0.001  |
| CCL2          | 3.54                                     | <0.001  | -1.19                                | 0.789   | 2.52                                         | 0.020   |
| CCL8          | 31.17                                    | <0.001  | -1.22                                | 0.982   | 34.31                                        | <0.001  |
| CD274         | 7.13                                     | 0.001   | -1.24                                | 0.938   | 9.13                                         | <0.001  |
| CD69          | 3.97                                     | 0.001   | -1.93                                | 0.593   | 4.41                                         | <0.001  |
| CD80          | 3.86                                     | <0.001  | 1.00                                 | 0.999   | 2.93                                         | 0.001   |
| CFB           | 1.20                                     | 0.209   | 1.05                                 | 0.779   | 1.34                                         | 0.065   |
| CLEC2B        | 2.86                                     | <0.001  | 1.31                                 | 0.576   | 3.06                                         | 0.001   |

|                         |       |        |       |       |       |        |
|-------------------------|-------|--------|-------|-------|-------|--------|
| <b>CMPK2</b>            | 12.98 | 0.001  | -1.05 | 0.991 | 22.02 | <0.001 |
| <b>CXCL10</b>           | 7.14  | <0.001 | -2.83 | 0.687 | 7.38  | <0.001 |
| <b>CXCL11</b>           | 15.28 | <0.001 | -1.00 | 0.999 | 15.19 | 0.003  |
| <b>DDX58</b>            | 4.12  | 0.005  | -1.72 | 0.819 | 7.51  | <0.001 |
| <b>DDX60</b>            | 4.56  | 0.016  | -1.70 | 0.785 | 7.30  | <0.001 |
| <b>DDX60L</b>           | 6.07  | 0.002  | -1.83 | 0.840 | 8.78  | <0.001 |
| <b>DNMT3L</b>           | -1.07 | 0.891  | -1.08 | 0.881 | -1.19 | 0.776  |
| <b>EIF2AK2</b>          | 4.53  | 0.002  | 1.14  | 0.902 | 6.59  | <0.001 |
| <b>EPST11</b>           | 7.15  | 0.001  | -1.04 | 0.985 | 10.76 | <0.001 |
| <b>ETV7</b>             | 8.63  | <0.001 | -5.98 | 0.709 | 12.05 | <0.001 |
| <b>FAM122C</b>          | 2.51  | 0.004  | -1.06 | 0.917 | 2.34  | 0.021  |
| <b>FAM124A</b>          | 1.41  | 0.303  | -1.11 | 0.812 | -1.94 | 0.289  |
| <b>FAM153A(FAM153B)</b> | 1.44  | 0.475  | 1.08  | 0.896 | 1.59  | 0.407  |
| <b>FAM26F</b>           | 28.96 | <0.001 | 4.21  | 0.635 | 31.56 | <0.001 |
| <b>FAR2</b>             | 2.83  | <0.001 | -1.09 | 0.874 | 2.22  | 0.029  |
| <b>FBXO6</b>            | 2.73  | 0.002  | 1.05  | 0.924 | 3.49  | <0.001 |
| <b>FCGR1A</b>           | 17.34 | 0.110  | 1.07  | 0.845 | 39.47 | 0.002  |
| <b>FCGR1B</b>           | 6.70  | <0.001 | 1.26  | 0.874 | 5.45  | 0.015  |
| <b>FRMD3</b>            | 20.05 | <0.001 | 1.90  | 0.875 | 19.18 | 0.005  |
| <b>FUT4</b>             | 3.08  | 0.012  | -1.46 | 0.707 | 2.07  | 0.248  |
| <b>GBP1</b>             | 12.01 | <0.001 | -1.38 | 0.932 | 13.13 | 0.001  |
| <b>GBP4</b>             | 12.23 | <0.001 | 1.10  | 0.977 | 14.73 | <0.001 |
| <b>GBP5</b>             | 6.18  | 0.001  | -1.25 | 0.900 | 6.44  | 0.003  |
| <b>GLS</b>              | -1.02 | 0.963  | -1.27 | 0.614 | 1.01  | 0.979  |
| <b>GMPR</b>             | 7.34  | <0.001 | -1.95 | 0.760 | 7.84  | <0.001 |
| <b>GOLGA6L4(PML)</b>    | 6.68  | <0.001 | -1.58 | 0.794 | 5.75  | 0.003  |
| <b>HEATR7B1</b>         | 1.23  | 0.589  | -1.08 | 0.874 | 1.33  | 0.494  |

|        |       |        |       |       |       |        |
|--------|-------|--------|-------|-------|-------|--------|
| HERC5  | 40.43 | 0.009  | -1.07 | 0.997 | 76.51 | <0.001 |
| HERC6  | 31.99 | 0.002  | -1.59 | 0.972 | 53.45 | <0.001 |
| HPSE   | 8.06  | <0.001 | 1.12  | 0.934 | 8.72  | <0.001 |
| HSH2D  | 3.13  | <0.001 | -2.63 | 0.222 | 2.92  | <0.001 |
| IDO1   | 38.20 | <0.001 | 1.52  | 0.811 | 33.26 | 0.004  |
| IFI16  | 4.69  | <0.001 | -1.23 | 0.840 | 4.48  | 0.001  |
| IFI44  | 3.84  | 0.001  | -1.11 | 0.909 | 5.27  | <0.001 |
| IFI44L | 4.45  | <0.001 | -2.93 | 0.463 | 4.85  | <0.001 |
| IFI6   | 1.37  | 0.146  | -1.72 | 0.117 | 1.34  | 0.233  |
| IFIH1  | 21.58 | 0.001  | -2.54 | 0.924 | 32.37 | <0.001 |
| IFIT1  | 12.50 | 0.005  | 1.09  | 0.986 | 20.03 | <0.001 |
| IFIT2  | 3.89  | 0.050  | -1.36 | 0.917 | 5.60  | 0.022  |
| IFIT3  | 3.29  | 0.008  | -1.25 | 0.904 | 6.10  | <0.001 |
| IFIT5  | 4.11  | <0.001 | -1.06 | 0.943 | 5.68  | <0.001 |
| IFITM1 | 2.09  | 0.011  | -1.39 | 0.516 | 2.12  | 0.021  |
| IFITM2 | 1.28  | 0.208  | 1.00  | 0.996 | 1.54  | 0.038  |
| IFITM3 | 1.22  | 0.128  | -1.13 | 0.435 | 1.09  | 0.575  |
| IL15RA | 2.77  | <0.001 | -1.13 | 0.800 | 2.56  | 0.003  |
| IRF1   | 2.87  | <0.001 | -1.26 | 0.684 | 2.66  | 0.004  |
| IRF2   | 1.58  | 0.019  | 1.10  | 0.701 | 2.05  | <0.001 |
| IRF7   | 6.19  | <0.001 | -1.63 | 0.713 | 7.06  | <0.001 |
| IRF9   | 1.57  | 0.003  | -1.20 | 0.388 | 1.84  | <0.001 |
| ISG15  | 4.12  | 0.020  | -3.19 | 0.617 | 6.12  | 0.001  |
| ISG20  | 8.28  | <0.001 | -5.56 | 0.663 | 9.14  | <0.001 |
| JAK2   | 2.62  | <0.001 | -1.09 | 0.822 | 2.61  | <0.001 |
| JAK3   | 1.60  | 0.115  | -2.20 | 0.174 | 1.01  | 0.990  |
| JUN    | 1.92  | 0.005  | -1.23 | 0.572 | 1.98  | 0.008  |

|         |        |        |        |       |         |        |
|---------|--------|--------|--------|-------|---------|--------|
| JUNB    | 2.77   | <0.001 | -1.04  | 0.937 | 2.38    | 0.007  |
| LAMP3   | 9.88   | 0.004  | -2.34  | 0.641 | 12.53   | 0.001  |
| LIPA    | 1.25   | 0.101  | 1.42   | 0.011 | 1.34    | 0.059  |
| MCOLN2  | 6.72   | <0.001 | -2.02  | 0.723 | 5.27    | 0.008  |
| MKX     | 3.94   | 0.042  | -1.24  | 0.897 | 1.97    | 0.548  |
| MLKL    | 8.86   | <0.001 | 1.16   | 0.934 | 9.97    | <0.001 |
| MNDA    | 4.13   | <0.001 | -1.08  | 0.897 | 3.59    | <0.001 |
| MX1     | 726.66 | 0.003  | 17.12  | 0.940 | 1046.18 | <0.001 |
| MX2     | 24.07  | <0.001 | 1.21   | 0.965 | 27.40   | <0.001 |
| MYD88   | 2.38   | 0.006  | 1.01   | 0.987 | 3.15    | <0.001 |
| MYOF    | 9.52   | <0.001 | 1.47   | 0.825 | 9.59    | <0.001 |
| NCOA7   | 7.24   | <0.001 | 1.57   | 0.741 | 9.50    | <0.001 |
| NEXN    | 9.00   | <0.001 | -1.11  | 0.960 | 6.78    | 0.011  |
| NMI     | 3.15   | 0.001  | -1.02  | 0.982 | 4.04    | <0.001 |
| NPAS2   | 1.63   | 0.011  | 1.19   | 0.454 | 1.72    | 0.011  |
| NT5C3   | 14.73  | 0.003  | -3.12  | 0.804 | 23.09   | <0.001 |
| OAS1    | 2.97   | <0.001 | -1.17  | 0.801 | 4.18    | <0.001 |
| OAS2    | 6.15   | 0.002  | -2.12  | 0.749 | 8.24    | <0.001 |
| OAS3    | 17.75  | <0.001 | -2.25  | 0.909 | 23.21   | <0.001 |
| ODF2L   | 2.33   | <0.001 | 1.12   | 0.720 | 2.13    | 0.004  |
| PARP12  | 3.47   | 0.003  | -1.41  | 0.724 | 4.77    | <0.001 |
| PARP8   | 1.63   | 0.004  | -1.00  | 0.993 | 1.57    | 0.021  |
| PARP9   | 2.32   | <0.001 | -1.13  | 0.736 | 2.78    | <0.001 |
| PER3    | -2.12  | 0.005  | 1.20   | 0.292 | -1.76   | 0.040  |
| PITPNM3 | -1.60  | 0.223  | -1.73  | 0.190 | 1.09    | 0.793  |
| PLEKHA4 | 4.83   | 0.076  | -11.33 | 0.626 | 5.80    | 0.053  |
| PLSCR1  | 6.21   | <0.001 | 1.13   | 0.924 | 8.37    | <0.001 |

|           |       |        |       |       |       |        |
|-----------|-------|--------|-------|-------|-------|--------|
| PNPT1     | 18.41 | 0.001  | 2.81  | 0.739 | 25.71 | <0.001 |
| PRIC285   | 5.67  | 0.065  | 1.04  | 0.987 | 8.58  | 0.010  |
| RGS1      | 10.93 | 0.003  | -1.46 | 0.925 | 13.42 | 0.001  |
| RIPK2     | 2.79  | 0.001  | 1.27  | 0.626 | 3.36  | <0.001 |
| RNF213    | 2.92  | <0.001 | -1.20 | 0.752 | 3.69  | <0.001 |
| RSAD2     | 4.72  | 0.002  | -1.15 | 0.945 | 7.23  | <0.001 |
| SAMD9     | 25.74 | 0.001  | -2.48 | 0.942 | 41.97 | <0.001 |
| SAMD9L    | 10.06 | <0.001 | -1.29 | 0.897 | 10.24 | <0.001 |
| SERPINB9  | 1.79  | 0.002  | -1.35 | 0.321 | 1.99  | <0.001 |
| SMCHD1    | 2.45  | <0.001 | 1.08  | 0.843 | 3.01  | <0.001 |
| SOCS1     | 3.27  | 0.006  | -1.78 | 0.778 | 5.81  | <0.001 |
| SP100     | 2.24  | 0.003  | -1.17 | 0.723 | 2.93  | <0.001 |
| SP110     | 6.07  | <0.001 | 1.00  | 0.999 | 7.87  | <0.001 |
| SP140     | 10.86 | <0.001 | -1.69 | 0.869 | 11.18 | <0.001 |
| ST3GAL5   | 1.93  | <0.001 | -1.09 | 0.709 | 1.76  | 0.003  |
| STAP1     | 30.97 | 0.001  | 1.55  | 0.956 | 39.19 | <0.001 |
| STAT1     | 5.09  | <0.001 | -1.28 | 0.824 | 6.24  | <0.001 |
| TAP2      | 4.34  | <0.001 | -1.98 | 0.594 | 5.55  | <0.001 |
| TFEC      | 4.53  | <0.001 | 1.36  | 0.569 | 4.54  | <0.001 |
| TLR7      | 7.68  | 0.107  | -1.25 | 0.675 | 13.49 | 0.010  |
| TMEM132E  | -1.91 | 0.129  | -1.99 | 0.130 | -1.10 | 0.794  |
| TMEM171   | 5.39  | 0.007  | -1.34 | 0.878 | 5.15  | 0.025  |
| TMEM229B  | 7.33  | 0.015  | 1.18  | 0.946 | 9.44  | 0.005  |
| TNFRSF10B | 1.15  | 0.291  | -1.15 | 0.402 | 1.11  | 0.488  |
| TNFSF13B  | 7.62  | <0.001 | 1.69  | 0.590 | 8.11  | <0.001 |
| TOX2      | -1.05 | 0.893  | 1.25  | 0.534 | -1.19 | 0.712  |
| TRIM21    | 7.29  | 0.003  | 1.21  | 0.919 | 12.02 | <0.001 |

|        |        |        |       |       |        |        |
|--------|--------|--------|-------|-------|--------|--------|
| TRIM22 | 3.22   | <0.001 | -1.15 | 0.800 | 3.92   | <0.001 |
| TRIM56 | 1.66   | 0.013  | -1.39 | 0.300 | 2.15   | <0.001 |
| TRIM69 | 4.54   | 0.014  | 1.44  | 0.763 | 5.19   | 0.011  |
| UBE2L6 | 2.48   | 0.001  | -1.09 | 0.847 | 3.01   | <0.001 |
| USP18  | 150.25 | 0.005  | 1.29  | 0.966 | 257.20 | <0.001 |
| WARS   | 4.16   | <0.001 | -1.24 | 0.819 | 4.18   | 0.001  |
| XAF1   | 2.38   | <0.001 | -1.36 | 0.400 | 2.53   | <0.001 |



Supplementary Table 5 – Select SNP genotypes

|             | Group A                | Group B | Group C | Group D | p-value           |
|-------------|------------------------|---------|---------|---------|-------------------|
| rs12979860  |                        |         |         |         | 0.84 <sup>2</sup> |
| CC          | 10 (67% <sup>1</sup> ) | 6 (43%) | 8 (53%) | 6 (43%) |                   |
| CT          | 4 (27%)                | 5 (36%) | 4 (27%) | 5 (36%) |                   |
| TT          | 1 (7%)                 | 3 (21%) | 3 (20%) | 3 (21%) |                   |
| Unavailable | 2                      | 4       | 3       | 3       |                   |
| rs7270101   |                        |         |         |         | 0.21 <sup>2</sup> |
| AA          | 13 (100%)              | 7 (70%) | 8 (89%) | 6 (67%) |                   |
| CA          | 0 (0%)                 | 2 (20%) | 1 (11%) | 3 (33%) |                   |
| CC          | 0 (0%)                 | 1 (10%) | 0 (0%)  | 0 (0%)  |                   |
| Unavailable | 4                      | 8       | 9       | 8       |                   |
| rs1127354   |                        |         |         |         | 0.56 <sup>2</sup> |
| AA          | 0 (0%)                 | 1 (10%) | 0 (0%)  | 0 (0%)  |                   |
| CA          | 3 (23%)                | 1 (10%) | 4 (33%) | 2 (22%) |                   |
| CC          | 10 (77%)               | 8 (80%) | 8 (67%) | 7 (78%) |                   |
| Unavailable | 4                      | 8       | 6       | 8       |                   |

<sup>1</sup> Percentage from patients with available genotype

<sup>2</sup> Pearson Chi-square

## SUPPLEMENTARY FIGURES

Supplementary figure 1– Examples of individual patterns of virological response to RBV monotherapy. Virological responders (A) can demonstrate a pattern of early (blue), late (black) or persistent response (red). Non-responders (B) could demonstrate no response, (black) or response with relapse (red). Dashed line represents the response cut-off of  $0.5 \log_{10}$ .

Supplementary figure 2 – Relative decline in serum ALT activity vs. decrease in serum HCV-RNA (A) or decrease in hemoglobin (B) after 4 weeks of ribavirin monotherapy. Data shown only for patients treated with RBV.

Supplementary Figure 3 – Microarray gene expression profiles based on response to monotherapy, limited to patients in groups A and C. (A) Clustering of samples according to the top three principal components of principal component analysis (PCA) of the expression of all 54613 transcripts. Red denotes virological non-responders to RBV and blue – responders. (B) Hierarchical clustering of patients in groups A and C based on the expression of 8 genes, identified as significantly ( $p < 0.001$ ) different between virological responders and non-responders to RBV. (C) Clustering of samples by PCA of the expression of all transcripts. Red denotes biochemical non-response to RBV and red – biochemical responders. (D) Hierarchical clustering of patients in groups A and C based on the expression of 48 genes, identified as significantly ( $p < 0.001$ ) different between biochemical responders and non-responders.

Supplementary Figure 4 – Hepatic mRNA expression of IRF9 (A), IRF7 (B) and ISG15 (C) according to treatment at time of liver biopsy. Expression measured by nCounter assay. Lines denote median values.

Supplementary Figure 5 – Relative hepatic expression level of interferon genes according to treatment at the time of liver biopsy, compared to untreated controls. Geometric mean + 95% CI. X-  $p < 0.1$ , \* -  $p < 0.05$ , \*\* -  $p < 0.01$ . Significance tested using Mann-Whitney U test.

Supplementary Figure 6 - Serial median mRNA expression levels in PBMC of CD274 (A), ISG15 (B), RSAD2 (C), CXCL10 (D) and IRF7 (E) during treatment. Solid line – patients treated with RBV monotherapy on weeks -4 to 0. Dotted line – controls with no pre-treatment.

Supplementary Figure 7 – Association between serum IP-10 level decline over 4 weeks of RBV treatment and the decline in HCV-RNA (A) or ALT (B) during the same time in patients with genotype 1 treated with RBV. The association between serum

1  
2  
3 IP-10 levels and hepatic CXCL10 mRNA expression (nCounter assay) at time 0 (C)  
4 for groups A and C or at 6 hours (D) for groups B and D.  
5  
6

7 Supplementary Figure 8 – Decline in HCV-RNA during 4 weeks of ribavirin pre-  
8 treatment by IL28B genotype.  
9  
10  
11  
12  
13  
14  
15  
16  
17  
18  
19  
20  
21  
22  
23  
24  
25  
26  
27  
28  
29  
30  
31  
32  
33  
34  
35  
36  
37  
38  
39  
40  
41  
42  
43  
44  
45  
46  
47  
48  
49  
50  
51  
52  
53  
54  
55  
56  
57  
58  
59  
60

1  
2  
3  
4  
5  
6  
7  
8  
9  
10  
11  
12  
13  
14  
15  
16  
17  
18  
19  
20  
21  
22  
23  
24  
25  
26  
27  
28  
29  
30  
31  
32  
33  
34  
35  
36  
37  
38  
39  
40  
41  
42  
43  
44  
45  
46  
47  
48  
49  
50  
51  
52  
53  
54  
55  
56  
57  
58  
59  
60

Supplementary Figure 1

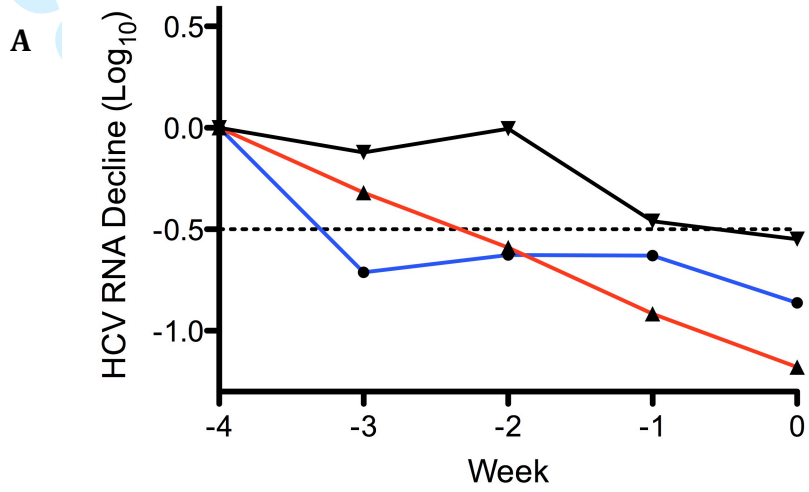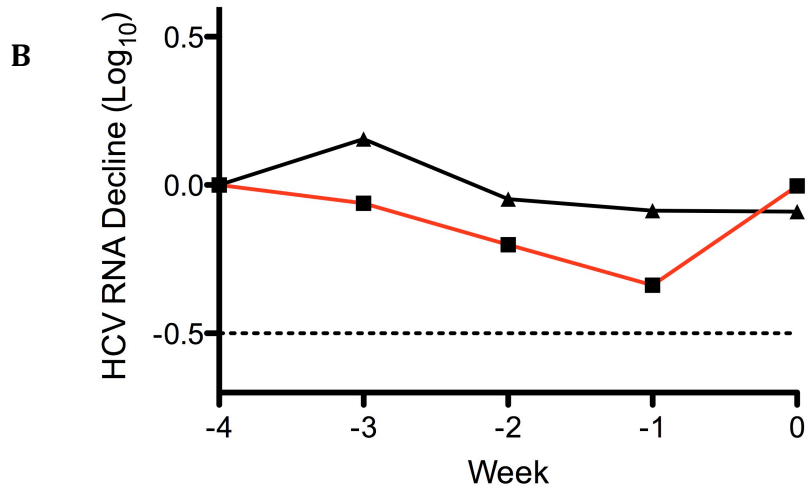

Supplementary Figure 2

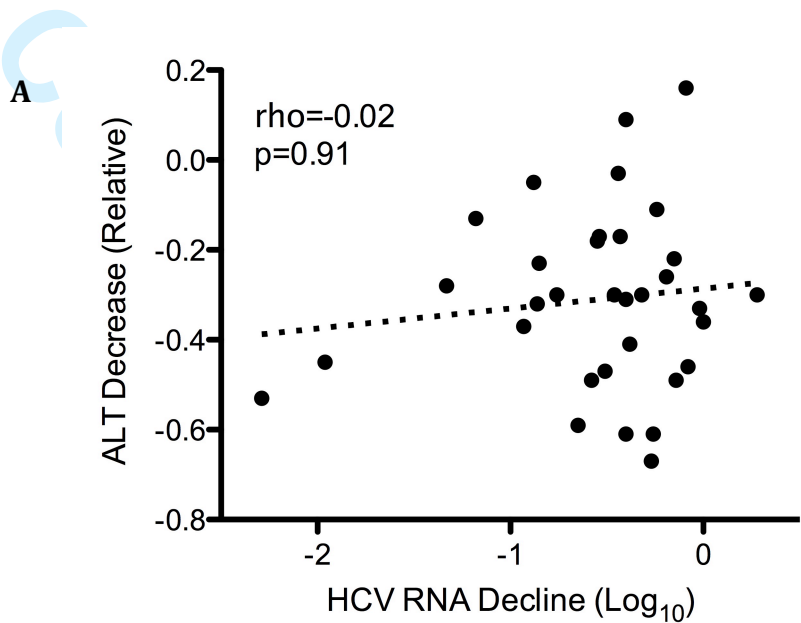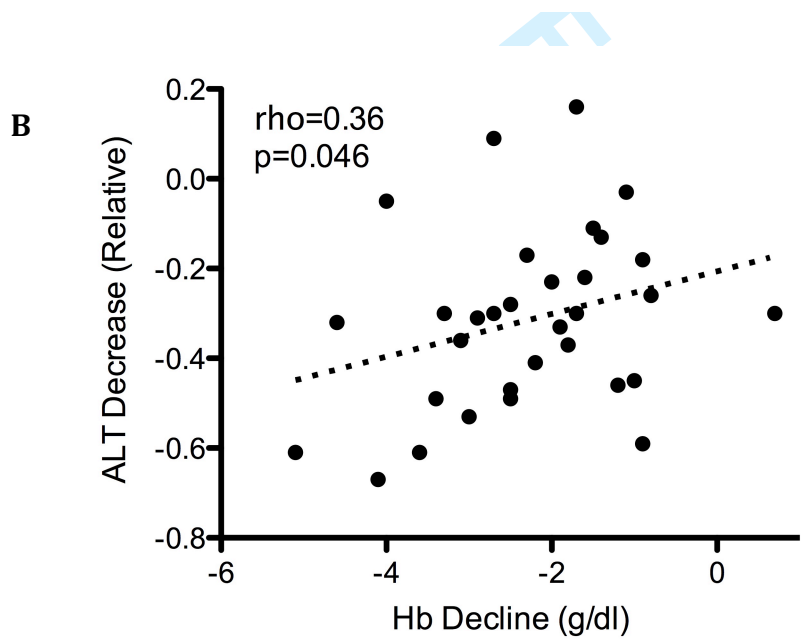

view Only

1  
2  
3  
4  
5  
6  
7  
8  
9  
10  
11  
12  
13  
14  
15  
16  
17  
18  
19  
20  
21  
22  
23  
24  
25  
26  
27  
28  
29  
30  
31  
32  
33  
34  
35  
36  
37  
38  
39  
40  
41  
42  
43  
44  
45  
46  
47  
48  
49  
50  
51  
52  
53  
54  
55  
56  
57  
58  
59  
60

### Supplementary Figure 3

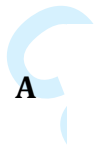

**A**

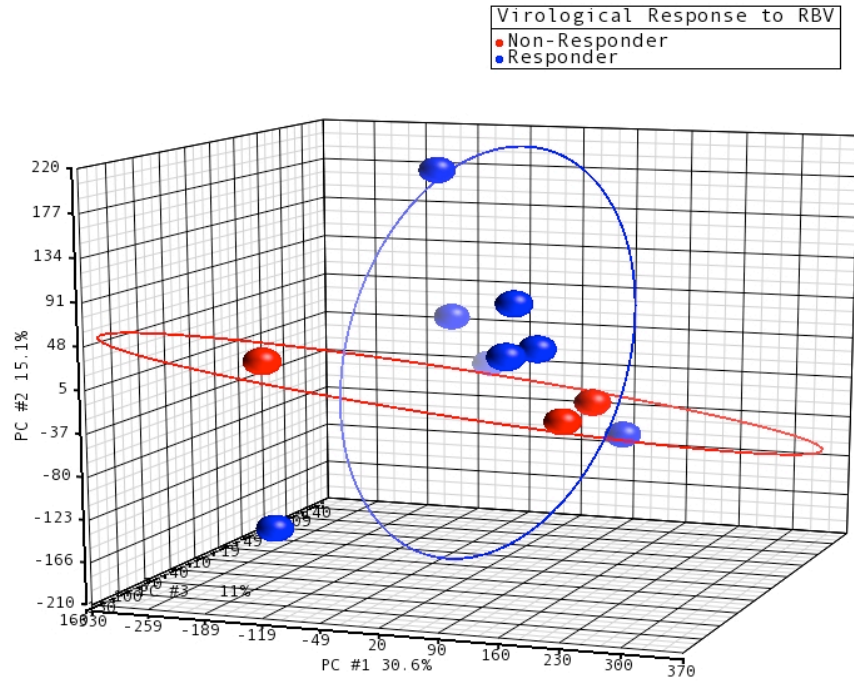

**B**

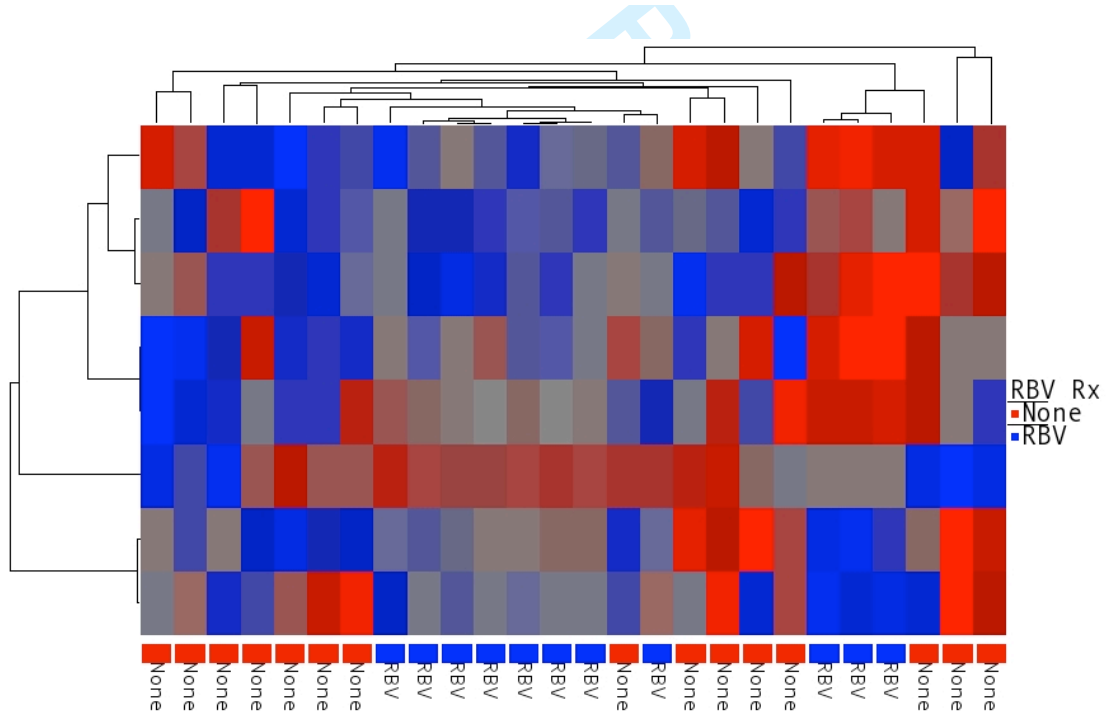

C

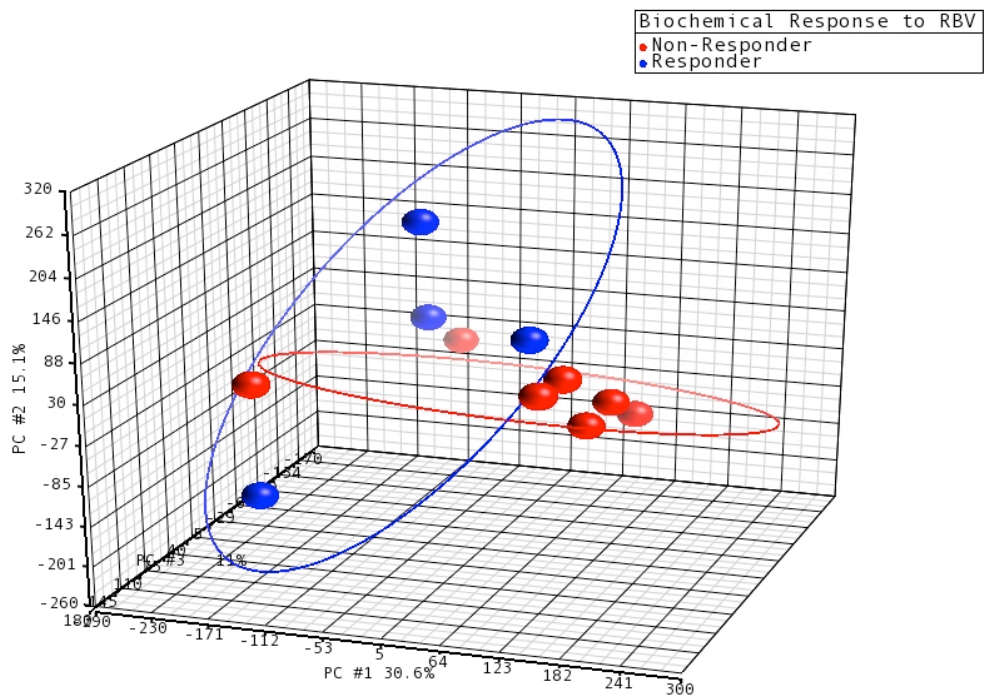

D

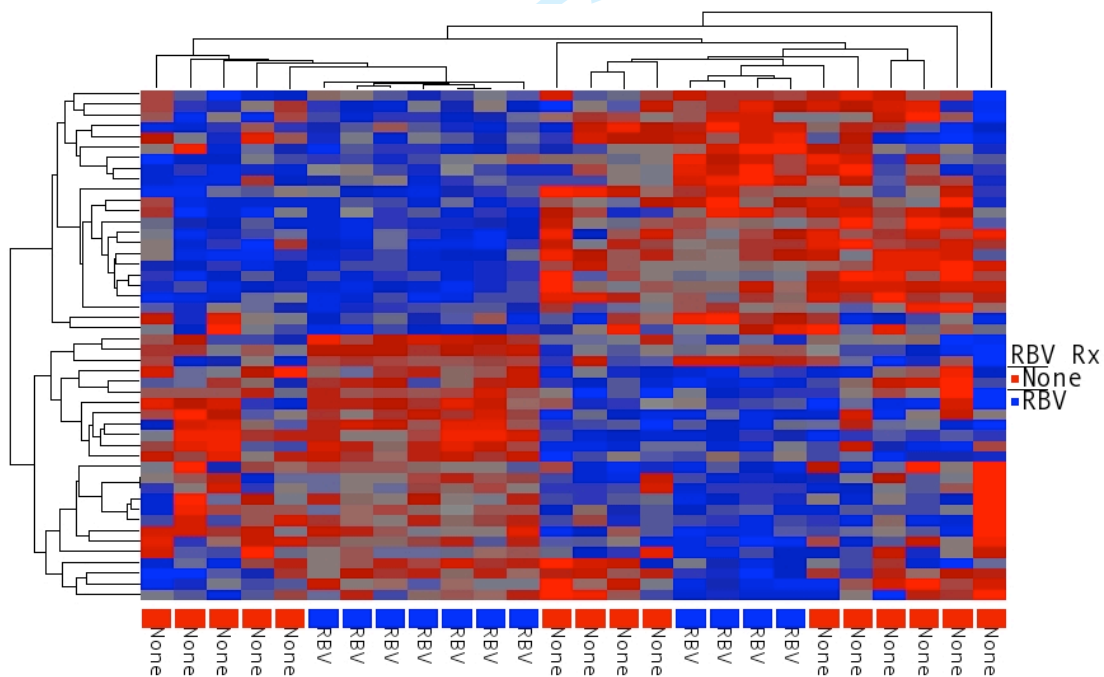

Supplementary Figure 4

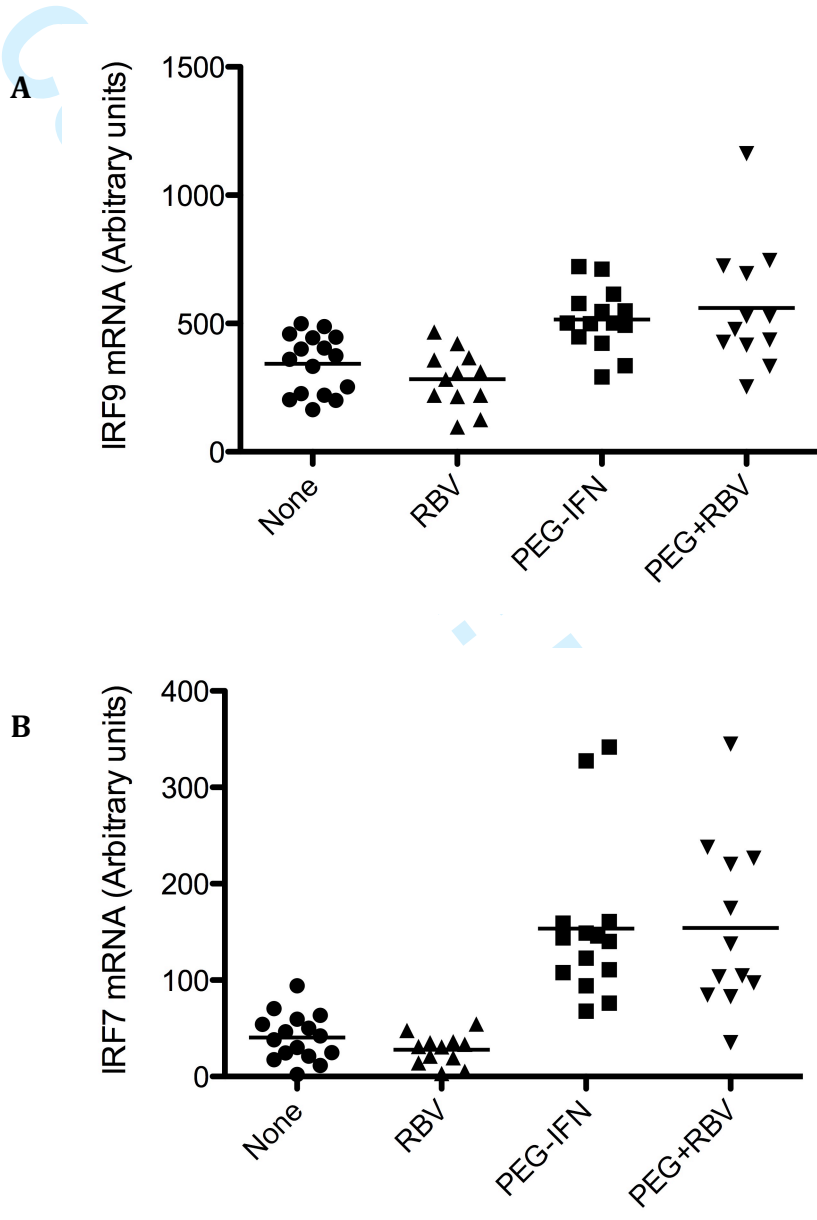

View Only



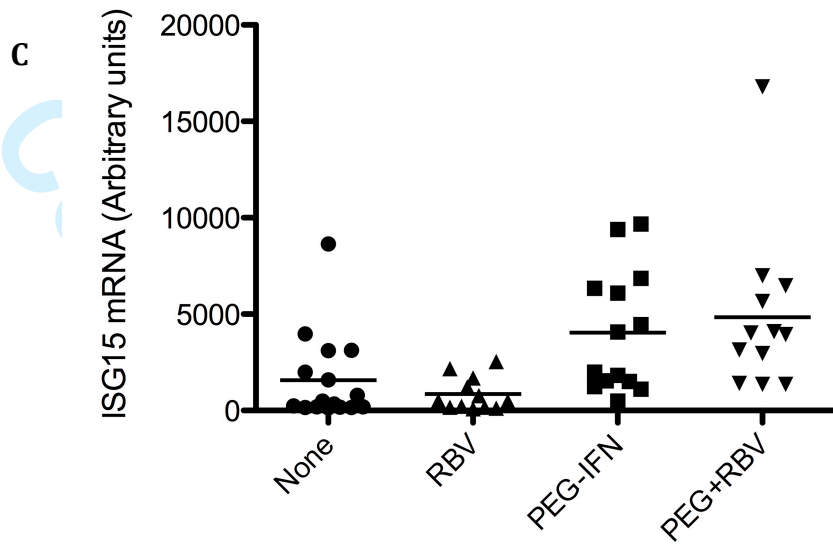

bioRxiv preprint doi: <https://doi.org/10.1101/2019.08.14.267479>; this version posted August 14, 2019. The copyright holder for this preprint (which was not certified by peer review) is the author/funder, who has granted bioRxiv a license to display the preprint in perpetuity. It is made available under aCC-BY-NC 4.0 International license.

1  
2  
3  
4  
5  
6  
7  
8  
9  
10  
11  
12  
13  
14  
15  
16  
17  
18  
19  
20  
21  
22  
23  
24  
25  
26  
27  
28  
29  
30  
31  
32  
33  
34  
35  
36  
37  
38  
39  
40  
41  
42  
43  
44  
45  
46  
47  
48  
49  
50  
51  
52  
53  
54  
55  
56  
57  
58  
59  
60

Supplementary Figure 5

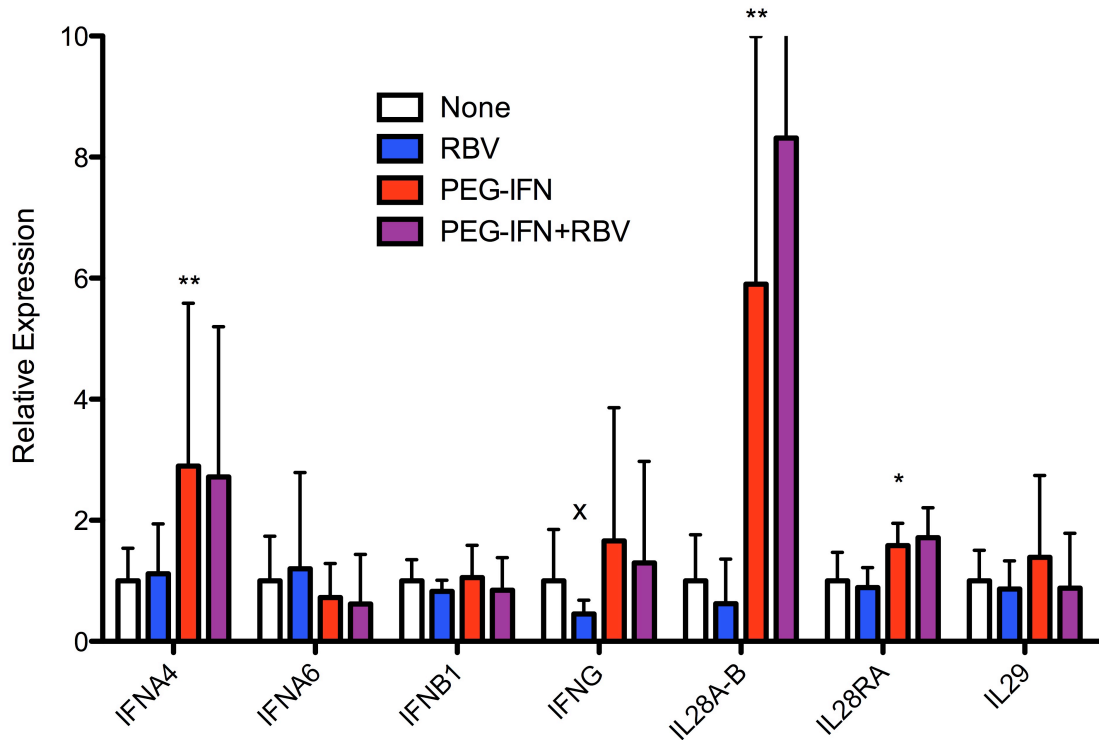

Review Only

Supplementary Figure 6

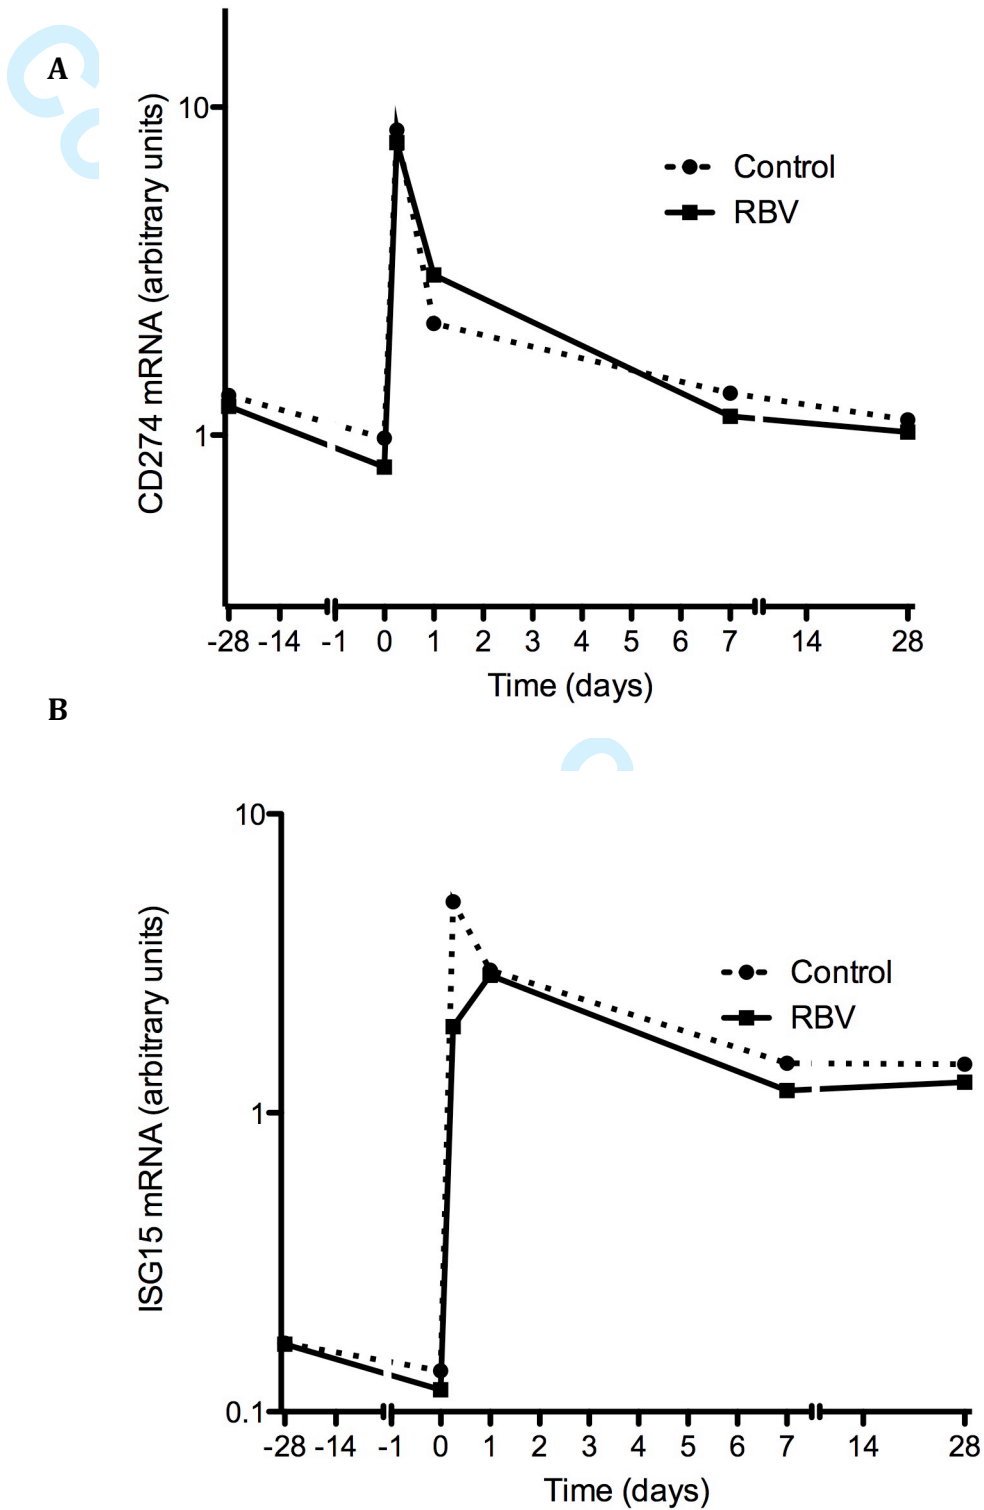

1  
2  
3  
4  
5  
6  
7  
8  
9  
10  
11  
12  
13  
14  
15  
16  
17  
18  
19  
20  
21  
22  
23  
24  
25  
26  
27  
28  
29  
30  
31  
32  
33  
34  
35  
36  
37  
38  
39  
40  
41  
42  
43  
44  
45  
46  
47  
48  
49  
50  
51  
52  
53  
54  
55  
56  
57  
58  
59  
60

C

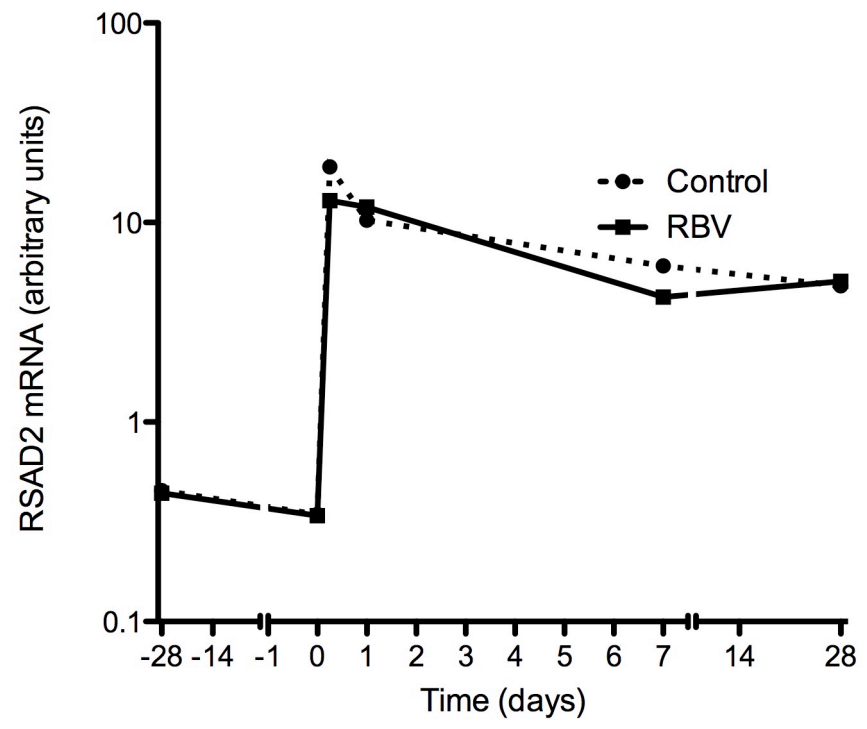

D

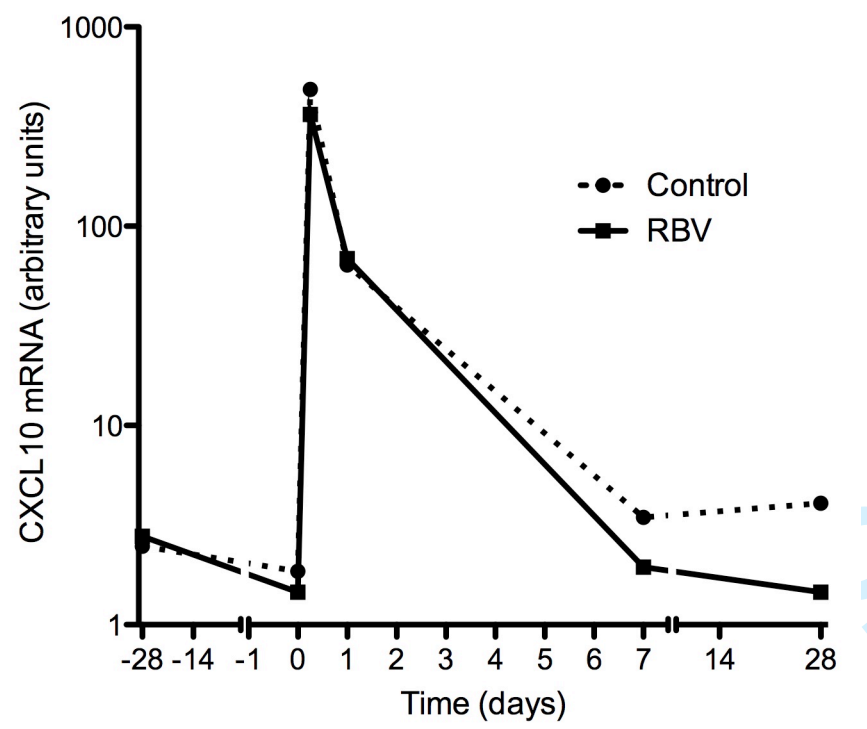

1  
2  
3  
4  
5  
6  
7  
8  
9  
10  
11  
12  
13  
14  
15  
16  
17  
18  
19  
20  
21  
22  
23  
24  
25  
26  
27  
28  
29  
30  
31  
32  
33  
34  
35  
36  
37  
38  
39  
40  
41  
42  
43  
44  
45  
46  
47  
48  
49  
50  
51  
52  
53  
54  
55  
56  
57  
58  
59  
60

E

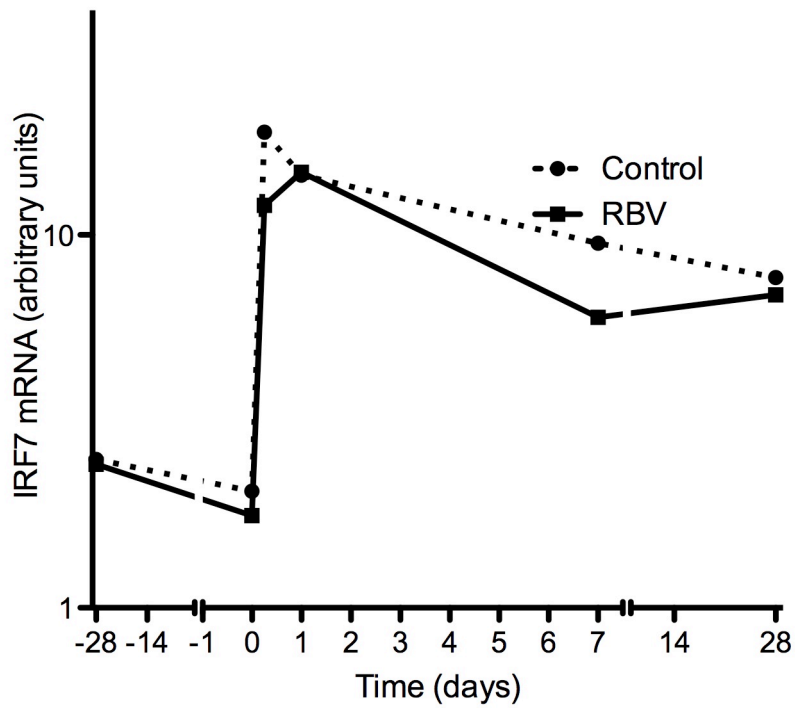

For Review Only

Supplementary Figure 7

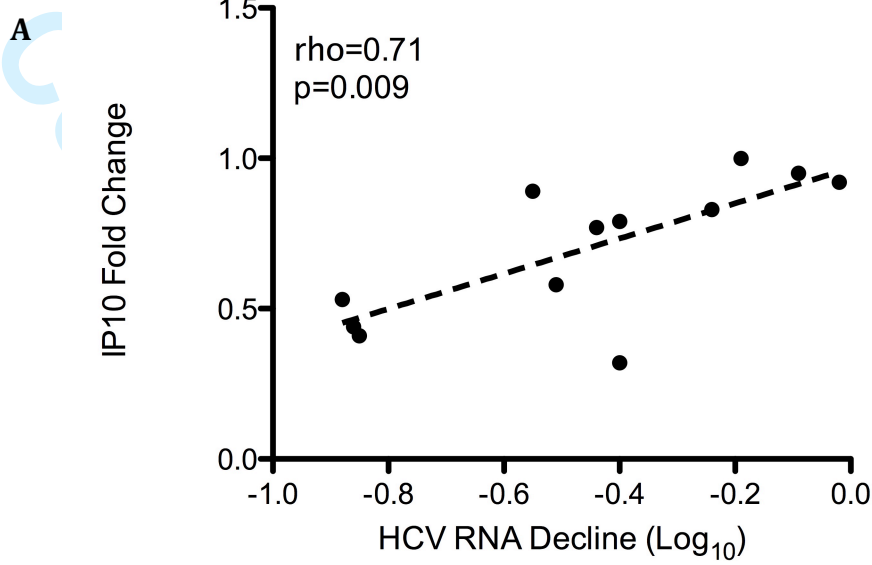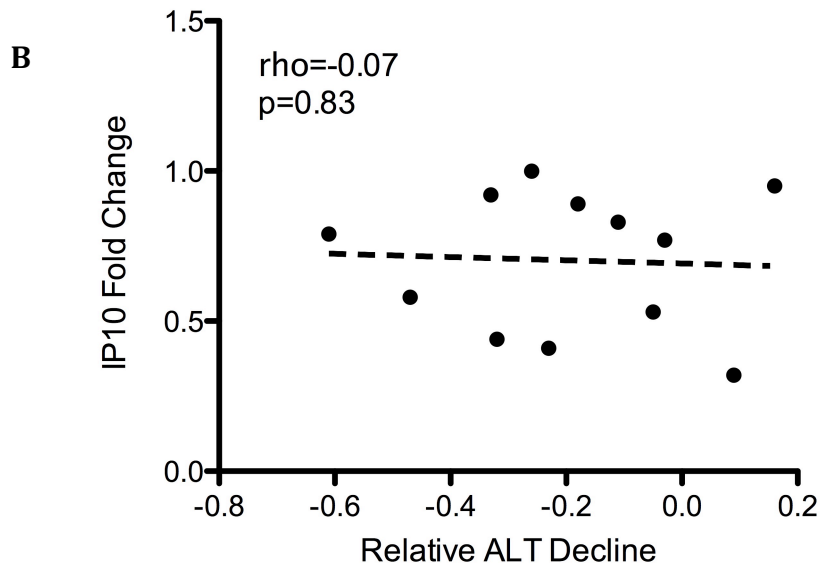

Manuscript Only

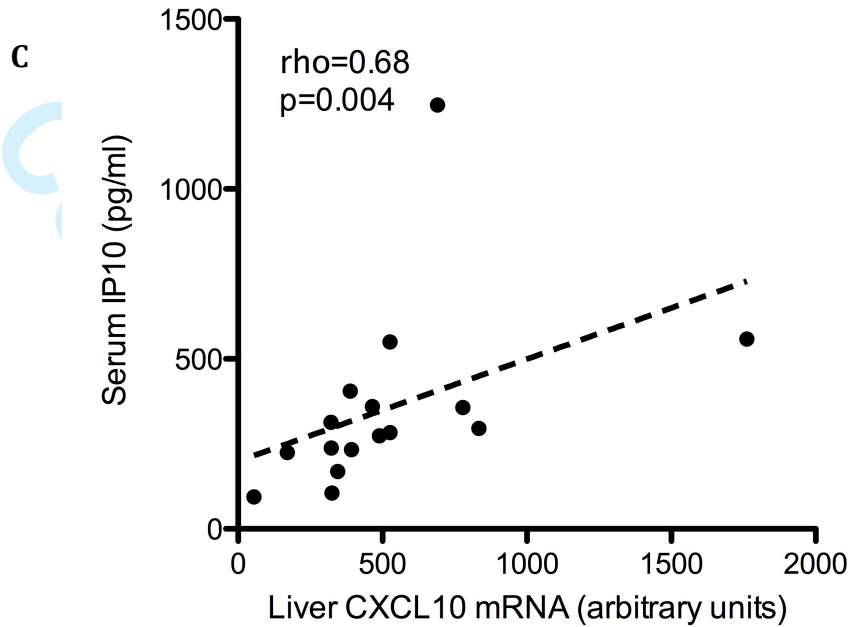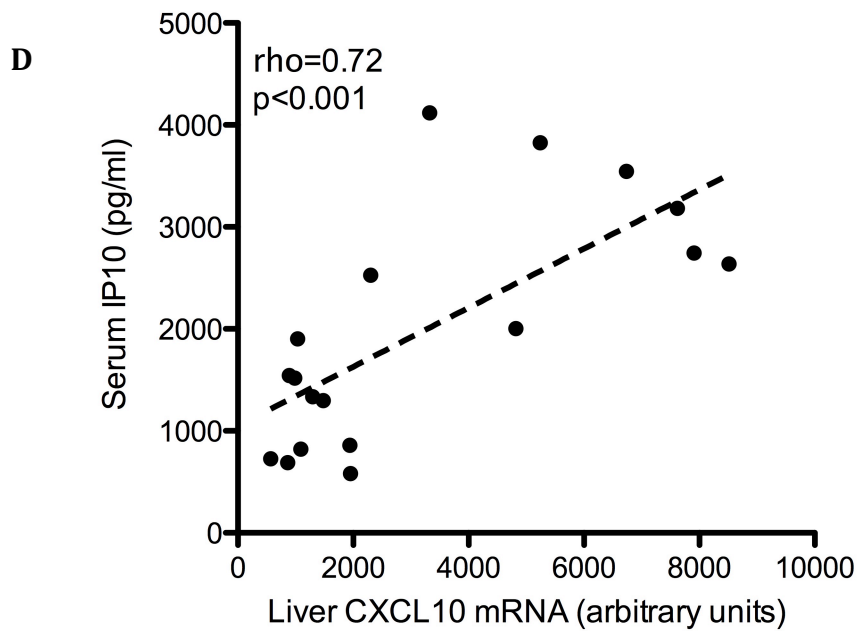

1  
2  
3  
4  
5  
6  
7  
8  
9  
10  
11  
12  
13  
14  
15  
16  
17  
18  
19  
20  
21  
22  
23  
24  
25  
26  
27  
28  
29  
30  
31  
32  
33  
34  
35  
36  
37  
38  
39  
40  
41  
42  
43  
44  
45  
46  
47  
48  
49  
50  
51  
52  
53  
54  
55  
56  
57  
58  
59  
60

Supplementary Figure 8

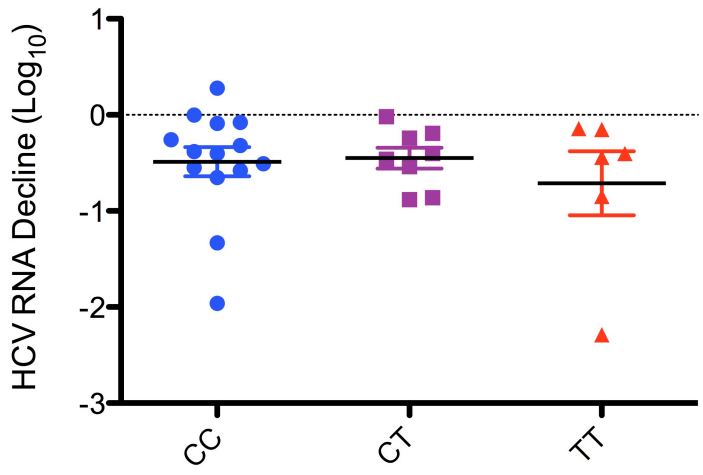

Manuscript For Review Only
